# Supplementary material
Source: PubMed Central journal article supplement (PMC7594318)

# Supporting Information

## Synthesis and Cytotoxic Evaluation of N-Alkyl-2-halophenazin-1-ones

Haruki Kohatsu, Shogo Kamo,<sup>†</sup> Masateru Furuta, Shusuke Tomoshige,<sup>‡</sup> Kouji Kuramochi\*  
Department of Applied Biological Science, Faculty of Science and Technology, Tokyo  
University of Science, 2641 Yamazaki, Noda, Chiba 278-8510, Japan.

Present address:

<sup>†</sup>Faculty of Pharmaceutical Sciences, Hoshi University, 2-4-41 Ebara, Shinagawa-ku, Tokyo 142-8501, Japan.

<sup>‡</sup>Graduate School of Life Sciences, Tohoku University, 2-1-1 Katahira, Aoba-ku, Sendai 980-8577, Japan.

### Index

#### <sup>1</sup>H and <sup>13</sup>C NMR spectroscopic data

|                                                                                                                        |     |
|------------------------------------------------------------------------------------------------------------------------|-----|
| <b>Figure S1.</b> <sup>1</sup> H NMR spectrum (400 MHz, DMSO- <i>d</i> <sub>6</sub> ) of <b>1b</b>                     | S3  |
| <b>Figure S2.</b> <sup>13</sup> C{ <sup>1</sup> H} NMR spectrum (100 MHz, DMSO- <i>d</i> <sub>6</sub> ) of <b>1b</b> . | S4  |
| <b>Figure S3.</b> HMBC spectrum of <b>1b</b> .                                                                         | S5  |
| <b>Figure S4.</b> HMQC spectrum of <b>1b</b> .                                                                         | S6  |
| <b>Figure S5.</b> NOESY spectrum of <b>1b</b> .                                                                        | S7  |
| <b>Figure S6.</b> <sup>1</sup> H NMR spectrum (400 MHz, DMSO- <i>d</i> <sub>6</sub> ) of <b>1c</b> .                   | S8  |
| <b>Figure S7.</b> <sup>13</sup> C{ <sup>1</sup> H} NMR spectrum (100 MHz, DMSO- <i>d</i> <sub>6</sub> ) of <b>1c</b> . | S9  |
| <b>Figure S8.</b> HMBC spectrum of <b>1c</b> .                                                                         | S10 |
| <b>Figure S9.</b> HMQC spectrum of <b>1c</b> .                                                                         | S11 |
| <b>Figure S10.</b> NOESY spectrum of <b>1c</b> .                                                                       | S12 |
| <b>Figure S11.</b> Zoom of NOESY spectrum of <b>1c</b> .                                                               | S13 |
| <b>Figure S12.</b> <sup>1</sup> H NMR spectrum (400 MHz, CDCl <sub>3</sub> , TMS) of <b>2b</b> .                       | S14 |
| <b>Figure S13.</b> <sup>13</sup> C{ <sup>1</sup> H} NMR spectrum (100 MHz, CDCl <sub>3</sub> ) of <b>2b</b> .          | S15 |
| <b>Figure S14.</b> <sup>1</sup> H NMR spectrum (400 MHz, CDCl <sub>3</sub> , TMS) of <b>2c</b> .                       | S16 |
| <b>Figure S15.</b> <sup>13</sup> C{ <sup>1</sup> H} NMR spectrum (100 MHz, CDCl <sub>3</sub> ) of <b>2c</b> .          | S17 |
| <b>Figure S16.</b> HMBC spectrum of <b>2c</b> .                                                                        | S18 |
| <b>Figure S17.</b> HMQC spectrum of <b>2c</b> .                                                                        | S19 |
| <b>Figure S18.</b> NOESY spectrum of <b>2c</b> .                                                                       | S20 |
| <b>Figure S19.</b> Zoom of NOESY spectrum of <b>2c</b> .                                                               | S21 |

|                                                                                                                 |     |
|-----------------------------------------------------------------------------------------------------------------|-----|
| <b>Figure S20.</b> $^1\text{H}$ NMR spectrum (400 MHz, $\text{CD}_3\text{OD}$ ) of <b>3b</b> .                  | S22 |
| <b>Figure S21.</b> $^{13}\text{C}\{^1\text{H}\}$ NMR spectrum (100 MHz, $\text{CD}_3\text{OD}$ ) of <b>3b</b> . | S23 |
| <b>Figure S22.</b> $^1\text{H}$ NMR spectrum (400 MHz, $\text{CD}_3\text{OD}$ ) of <b>3c</b> .                  | S24 |
| <b>Figure S23.</b> $^{13}\text{C}\{^1\text{H}\}$ NMR spectrum (100 MHz, $\text{CD}_3\text{OD}$ ) of <b>3c</b> . | S25 |
| <b>Figure S24.</b> HMBC spectrum of <b>3c</b> .                                                                 | S26 |
| <b>Figure S25.</b> HMQC spectrum of <b>3c</b> .                                                                 | S27 |
| <b>Figure S26.</b> NOESY spectrum of <b>3c</b> .                                                                | S28 |
| <b>Figure S27.</b> $^1\text{H}$ NMR spectrum (400 MHz, $\text{CDCl}_3$ , TMS) of <b>7</b> .                     | S29 |
| <b>Figure S28.</b> $^{13}\text{C}\{^1\text{H}\}$ NMR spectrum (100 MHz, $\text{CDCl}_3$ ) of <b>7</b> .         | S30 |
| <b>Figure S29.</b> HMBC spectrum of <b>7</b> .                                                                  | S31 |
| <b>Figure S30.</b> HMQC spectrum of <b>7</b> .                                                                  | S32 |
| <b>Figure S31.</b> NOESY spectrum of <b>7</b> .                                                                 | S33 |
| <b>Figure S32.</b> Zoom of NOESY spectrum of <b>7</b> (8.5 ppm – 3.0 ppm).                                      | S34 |
| <b>Figure S33.</b> Zoom of NOESY spectrum of <b>7</b> (6.6 ppm – 4.0 ppm).                                      | S35 |
| <b>Figure S34.</b> $^1\text{H}$ NMR spectrum (400 MHz, $\text{CDCl}_3$ , TMS) of <b>8</b> .                     | S36 |
| <b>Figure S35.</b> $^{13}\text{C}\{^1\text{H}\}$ NMR spectrum (100 MHz, $\text{CDCl}_3$ ) of <b>8</b> .         | S37 |
| <b>Figure S36.</b> HMBC spectrum of <b>8</b> .                                                                  | S38 |
| <b>Figure S37.</b> HMQC spectrum of <b>8</b> .                                                                  | S39 |
| <b>Figure S38.</b> NOESY spectrum of <b>8</b> .                                                                 | S40 |
| <b>Figure S39.</b> Zoom of NOESY spectrum of <b>8</b> .                                                         | S41 |

Figure S1. <sup>1</sup>H NMR spectrum (400 MHz, DMSO-*d*<sub>6</sub>) of **1b**.

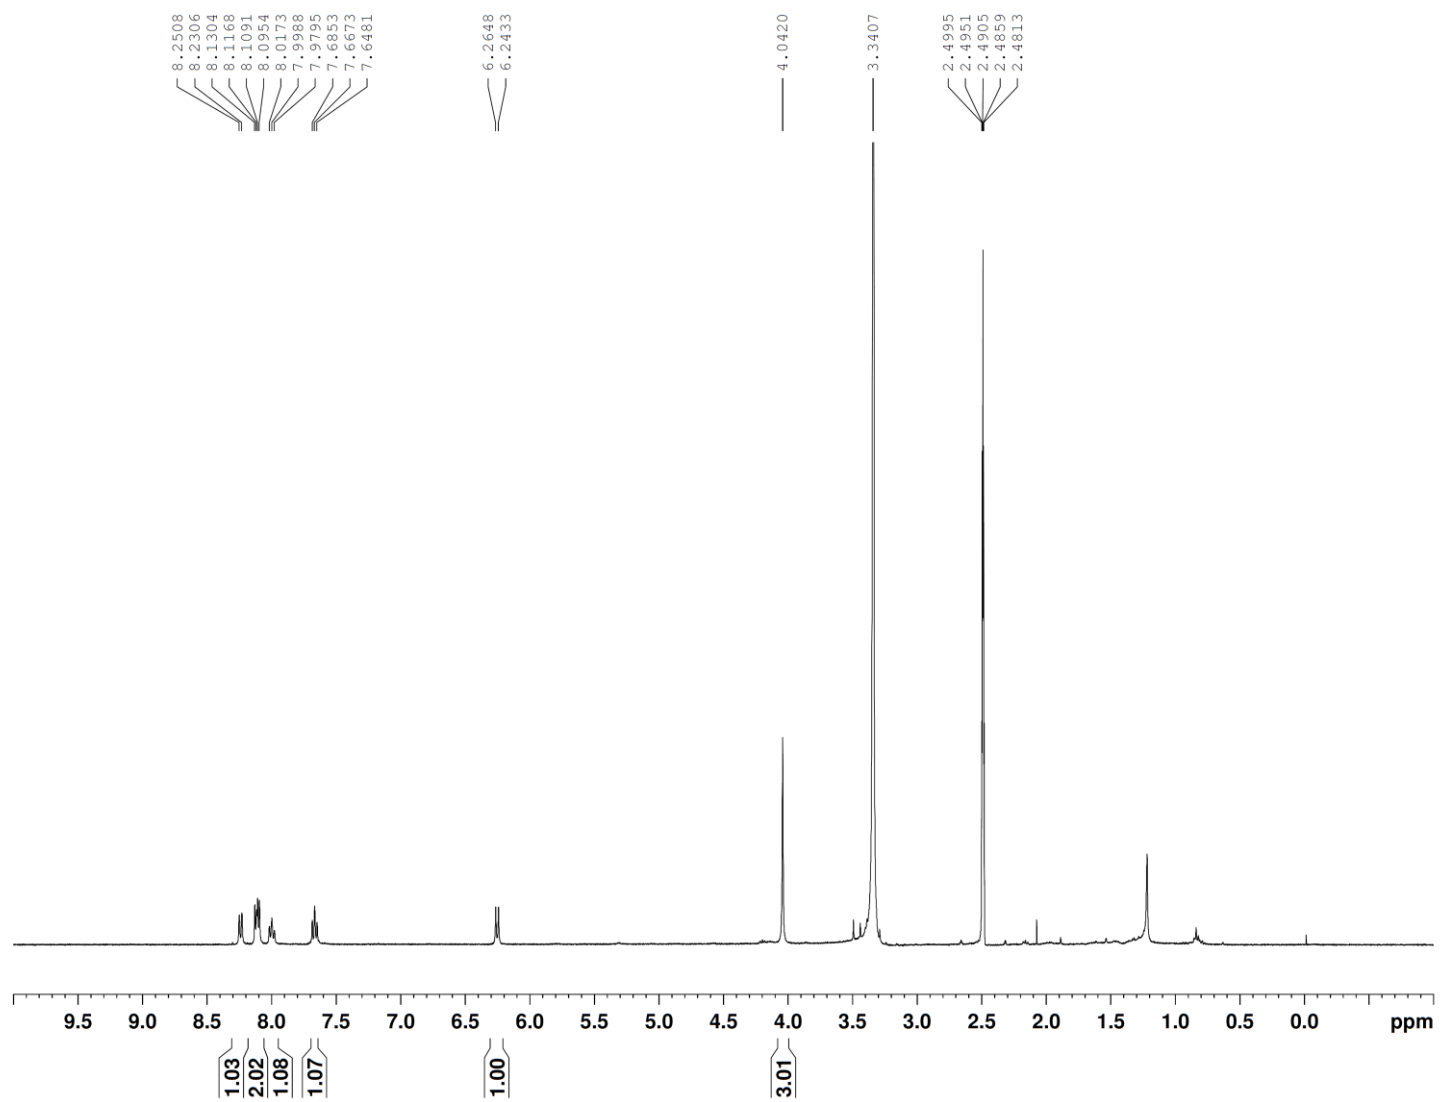

**Figure S2.**  $^{13}\text{C}\{^1\text{H}\}$  NMR spectrum (100 MHz,  $\text{DMSO-}d_6$ ) of **1b**.

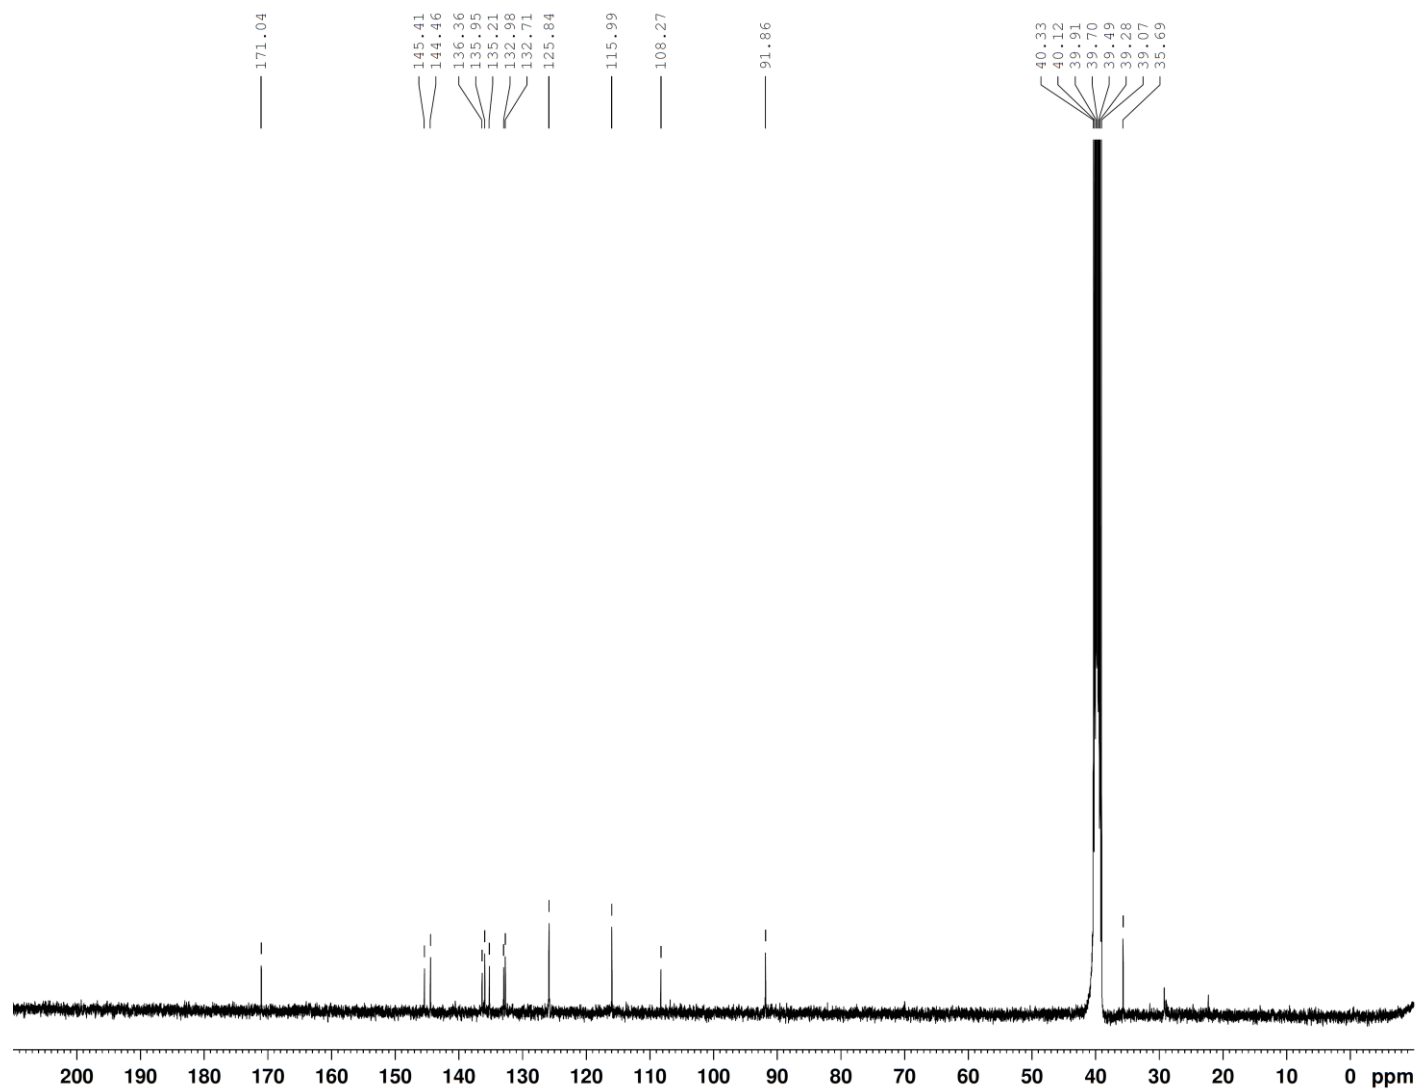

Figure S3. HMBC spectrum of 1b.

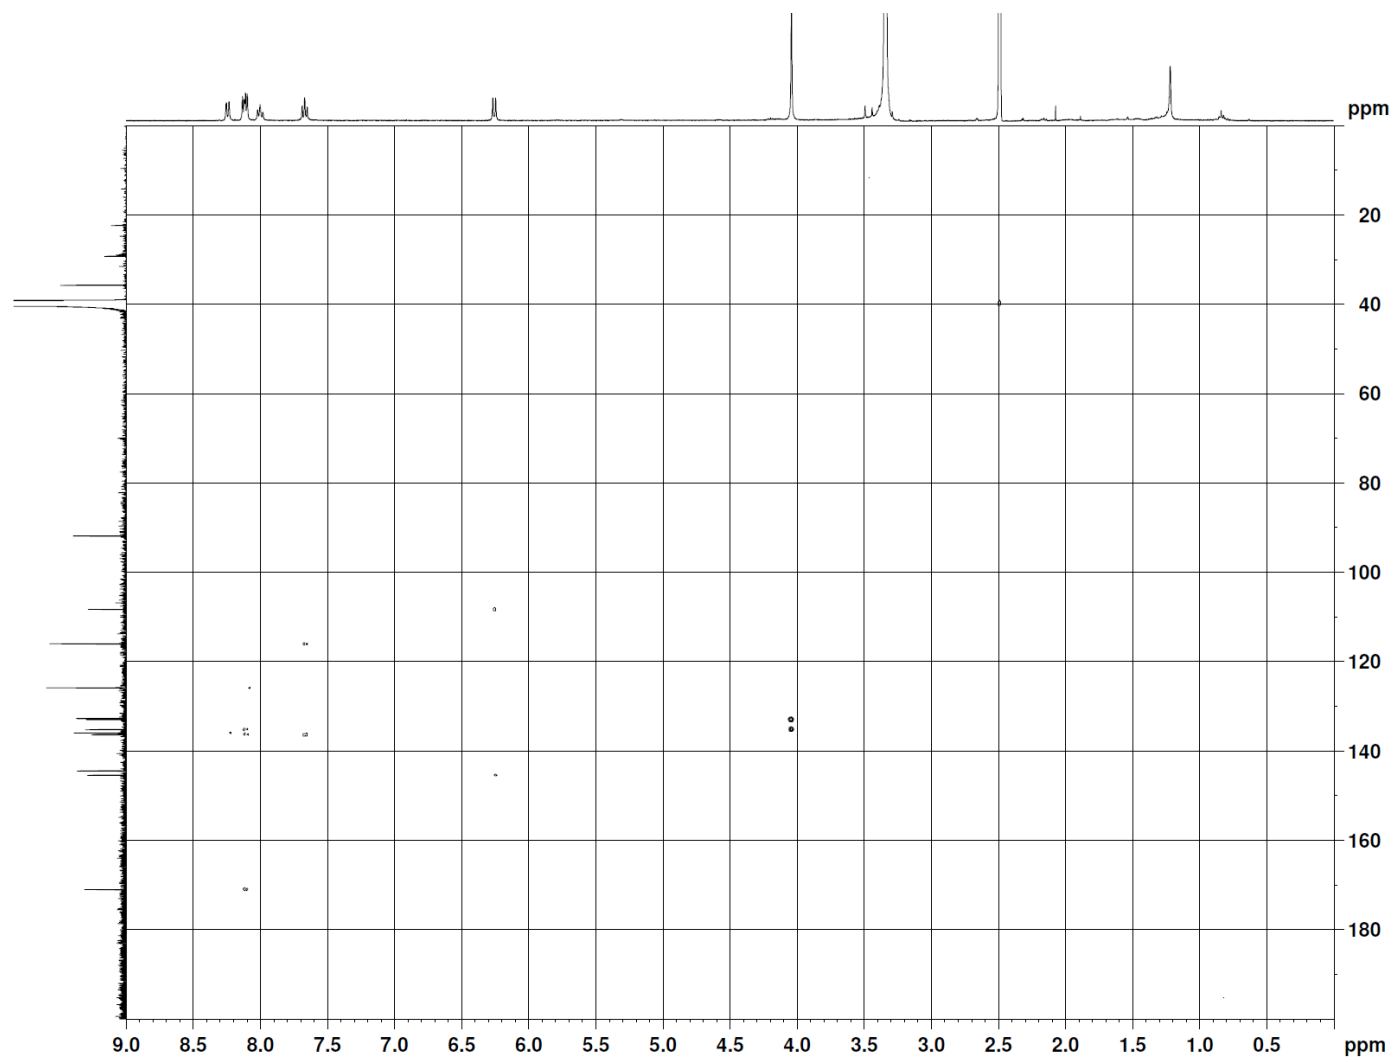

Figure S4. HMQC spectrum of **1b**.

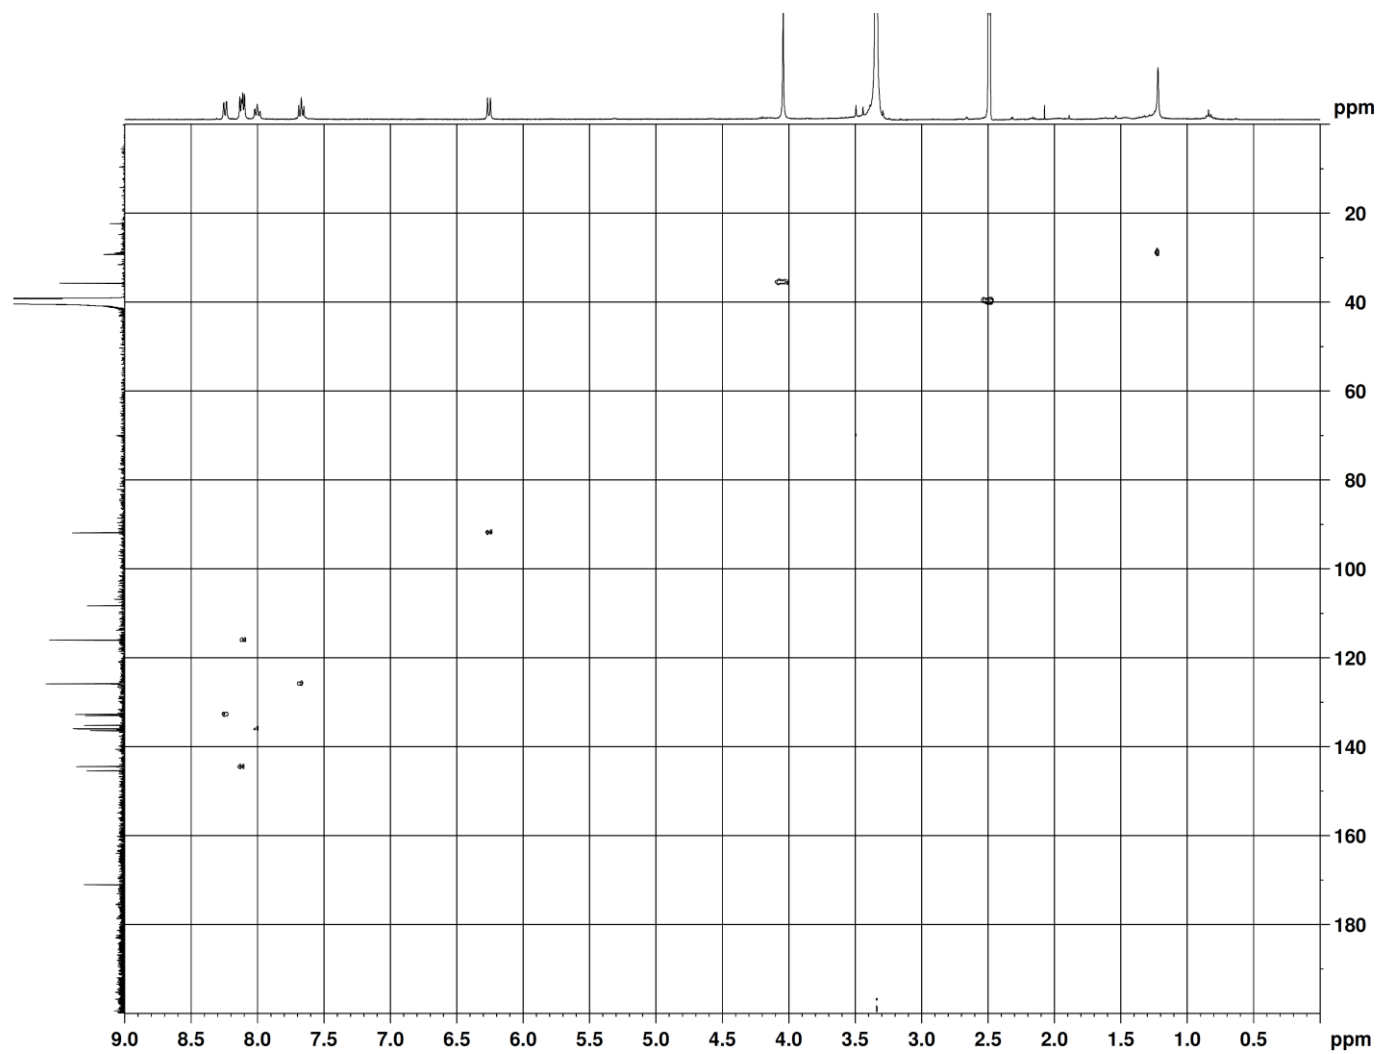

Figure S5. NOESY spectrum of **1b**.

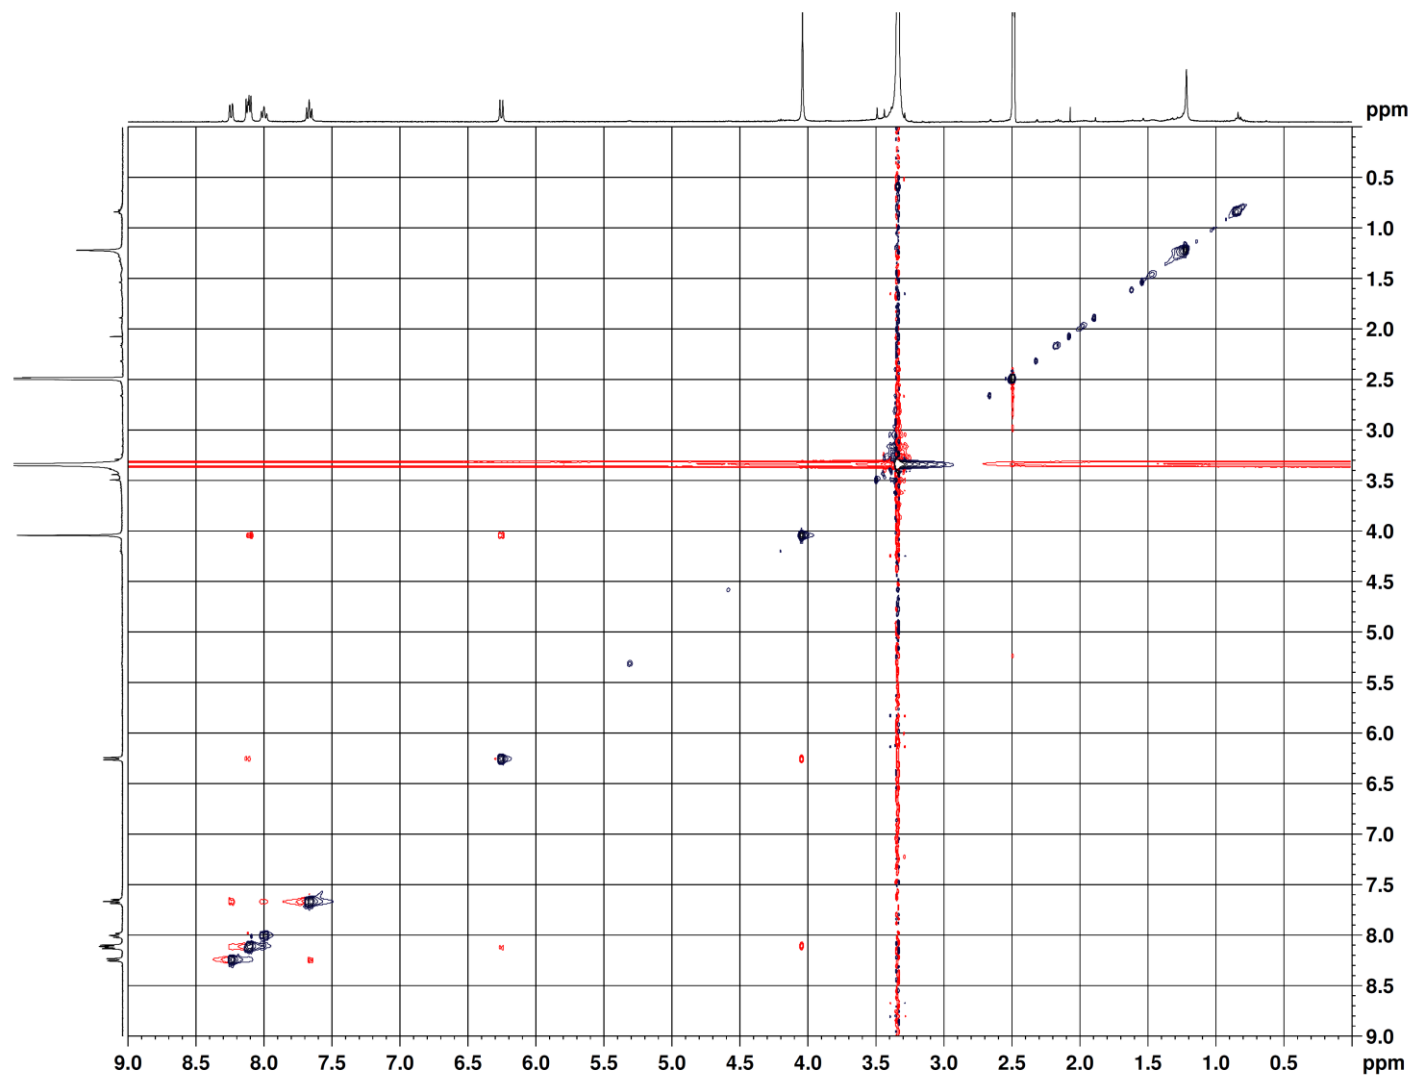

**Figure S6.**  $^1\text{H}$  NMR spectrum (400 MHz,  $\text{DMSO-}d_6$ ) of **1c**.

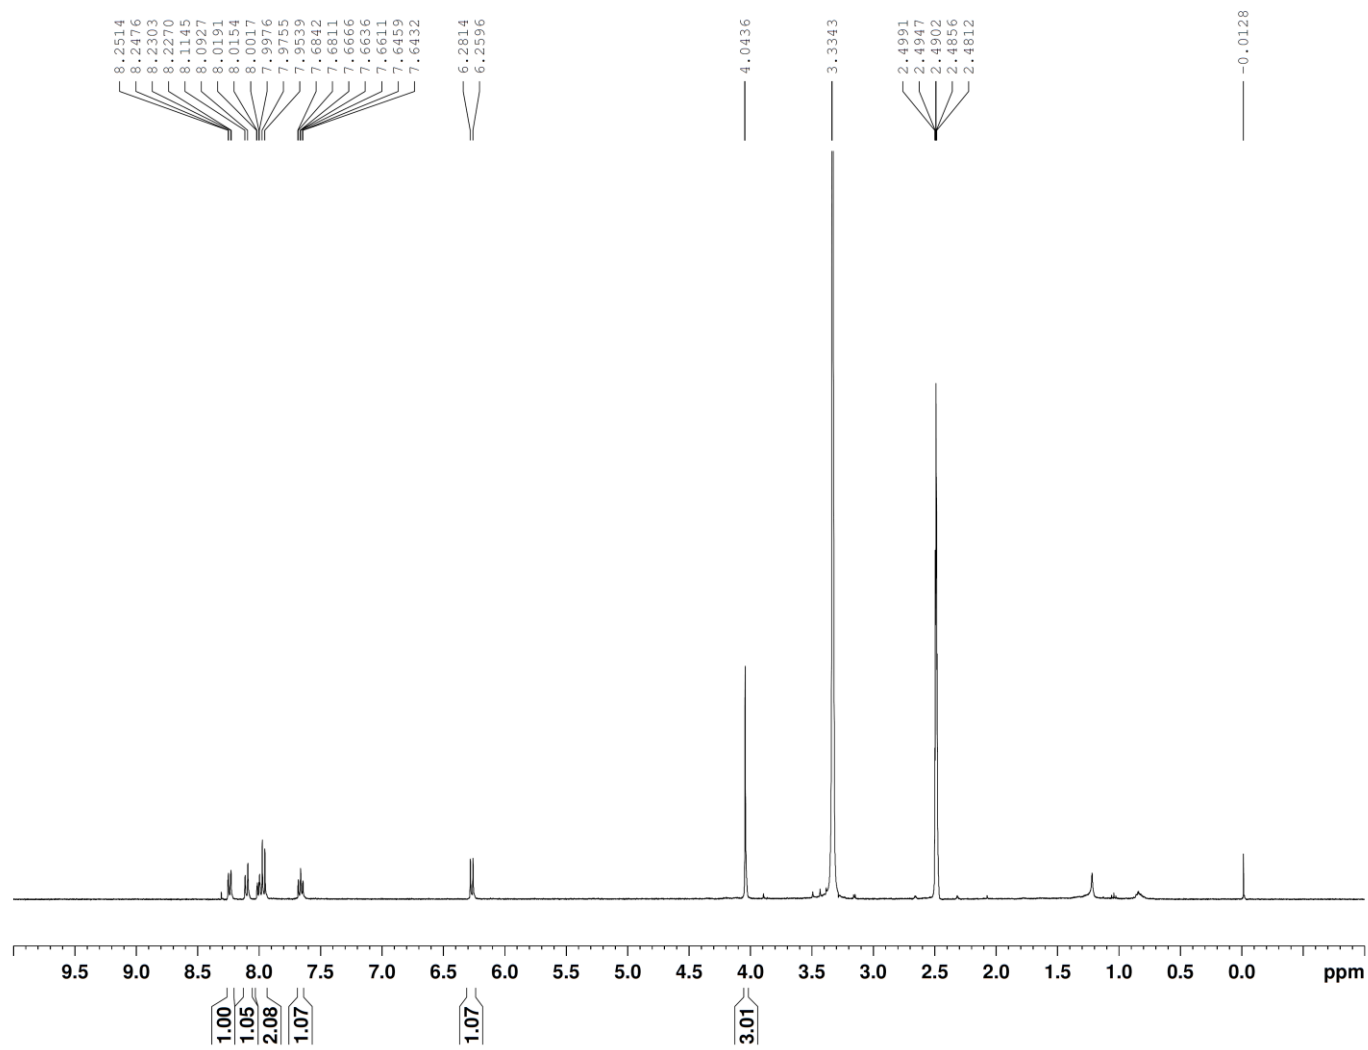



**Figure S7.**  $^{13}\text{C}\{^1\text{H}\}$  NMR spectrum (100 MHz,  $\text{DMSO-}d_6$ ) of **1c**.

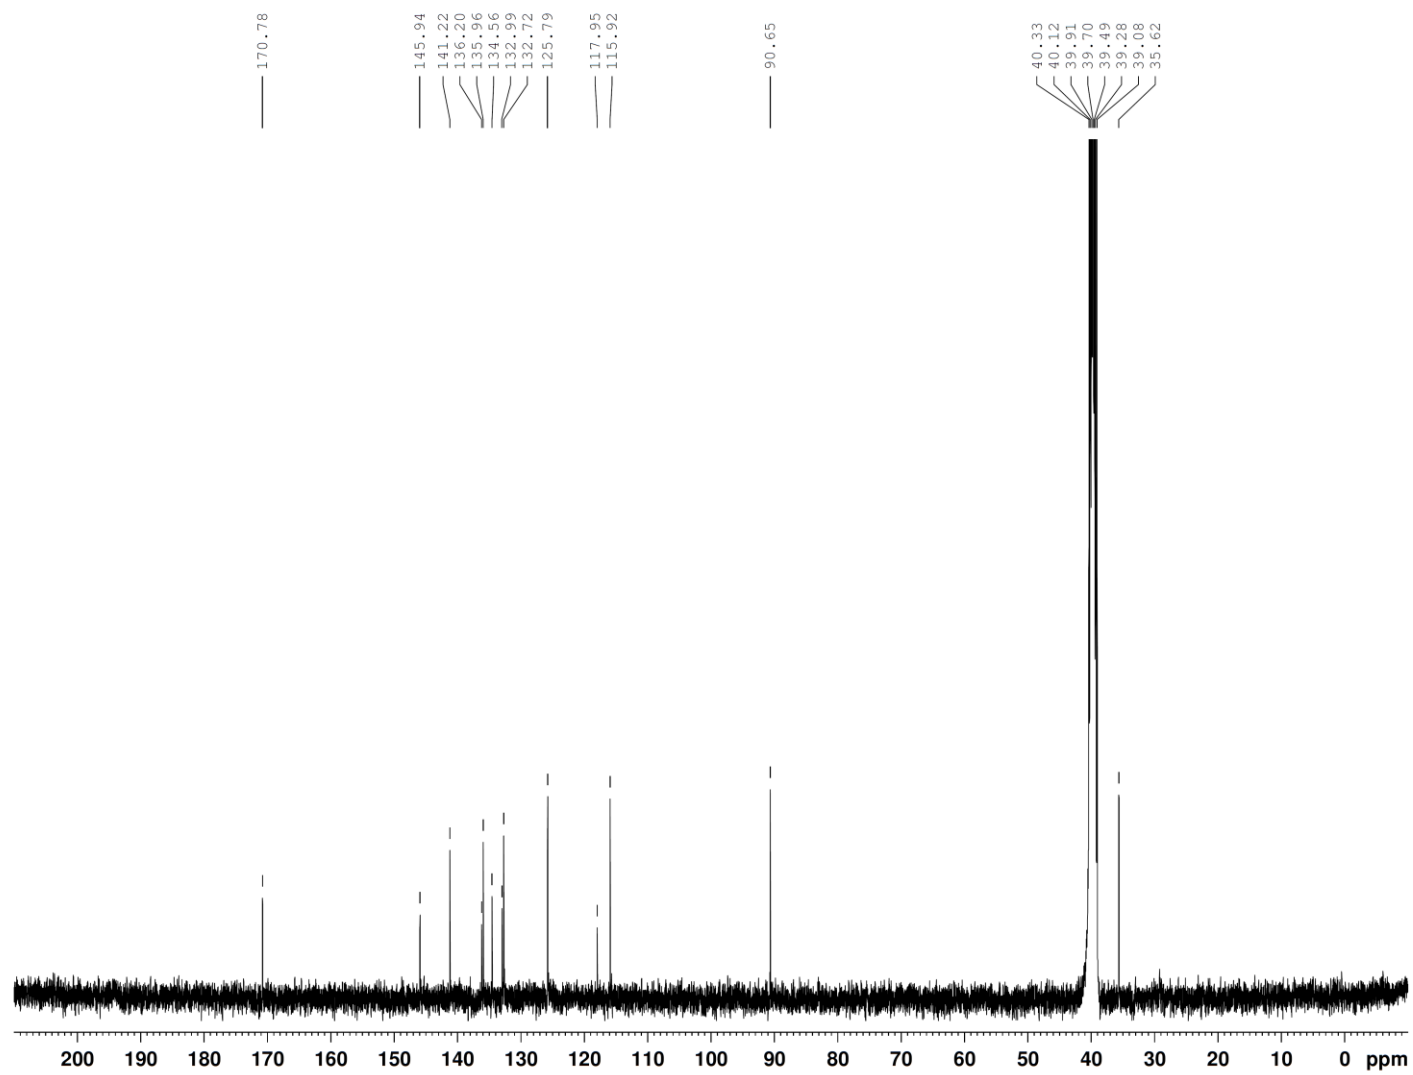

Figure S8. HMBC spectrum of 1c.

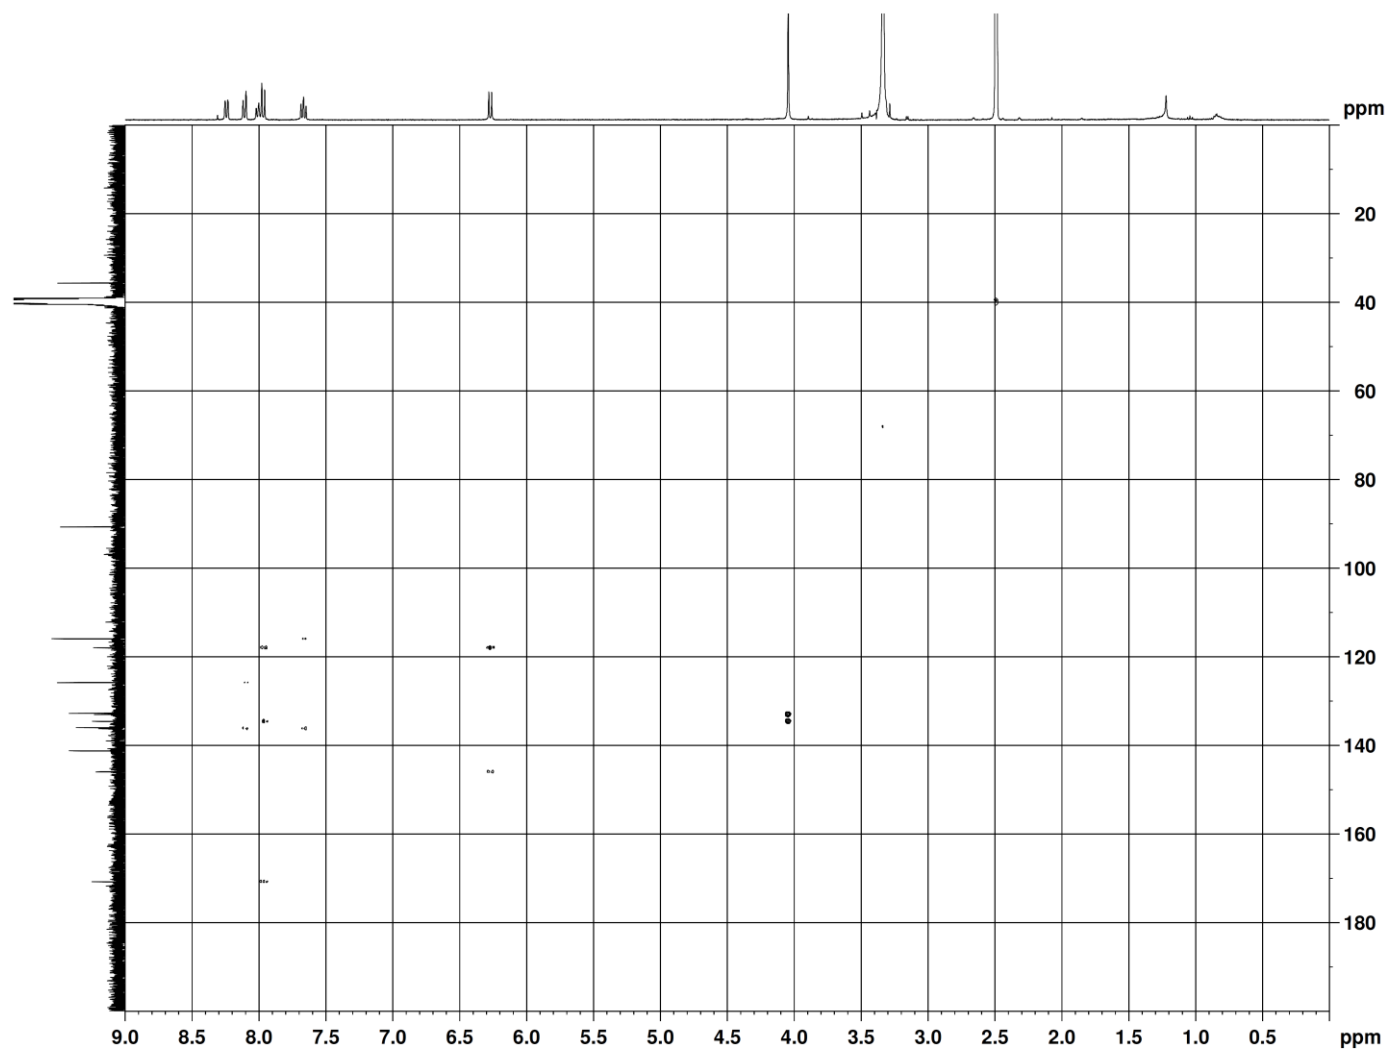

Figure S9. HMQC spectrum of 1c.

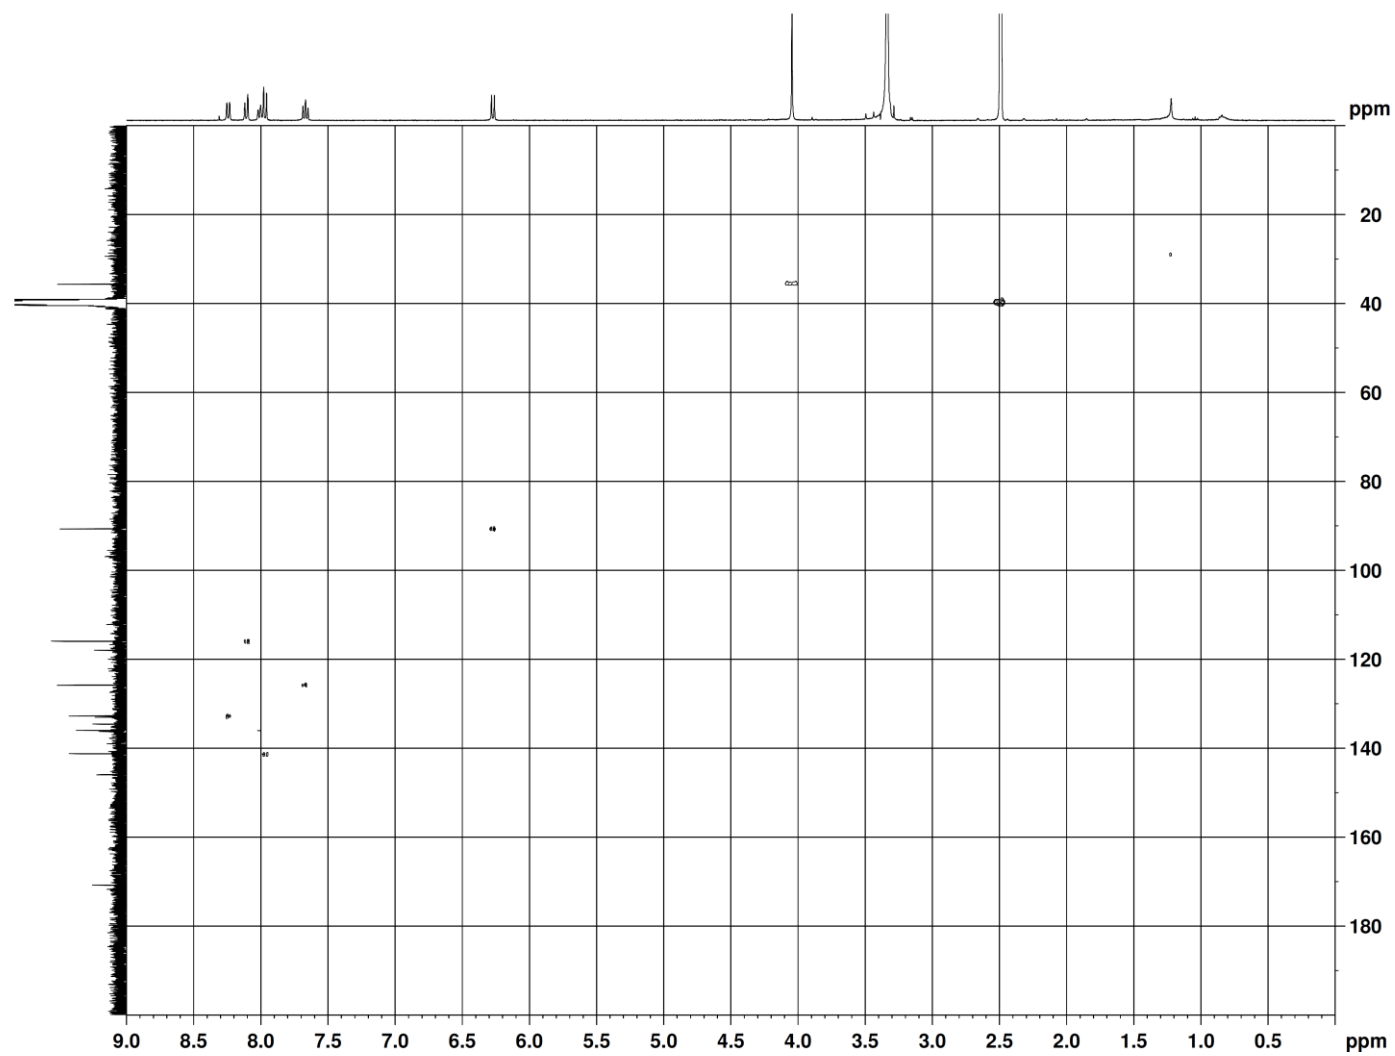

Figure S10. NOESY spectrum of **1c**.

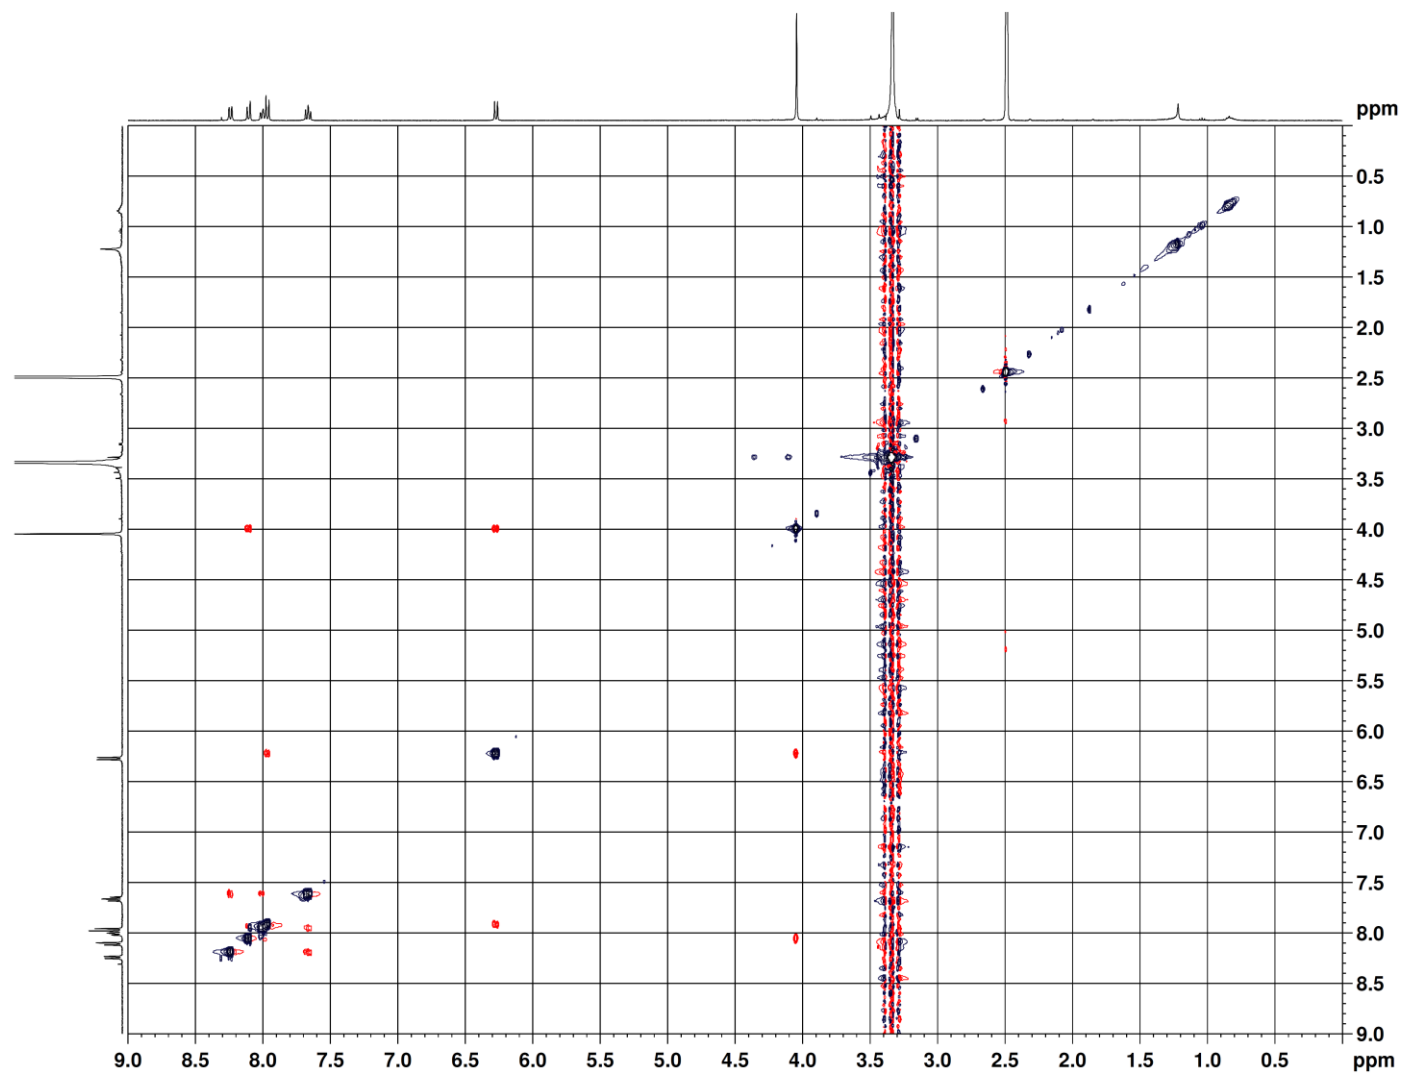

Figure S11. Zoom of NOESY spectrum of **1c**.

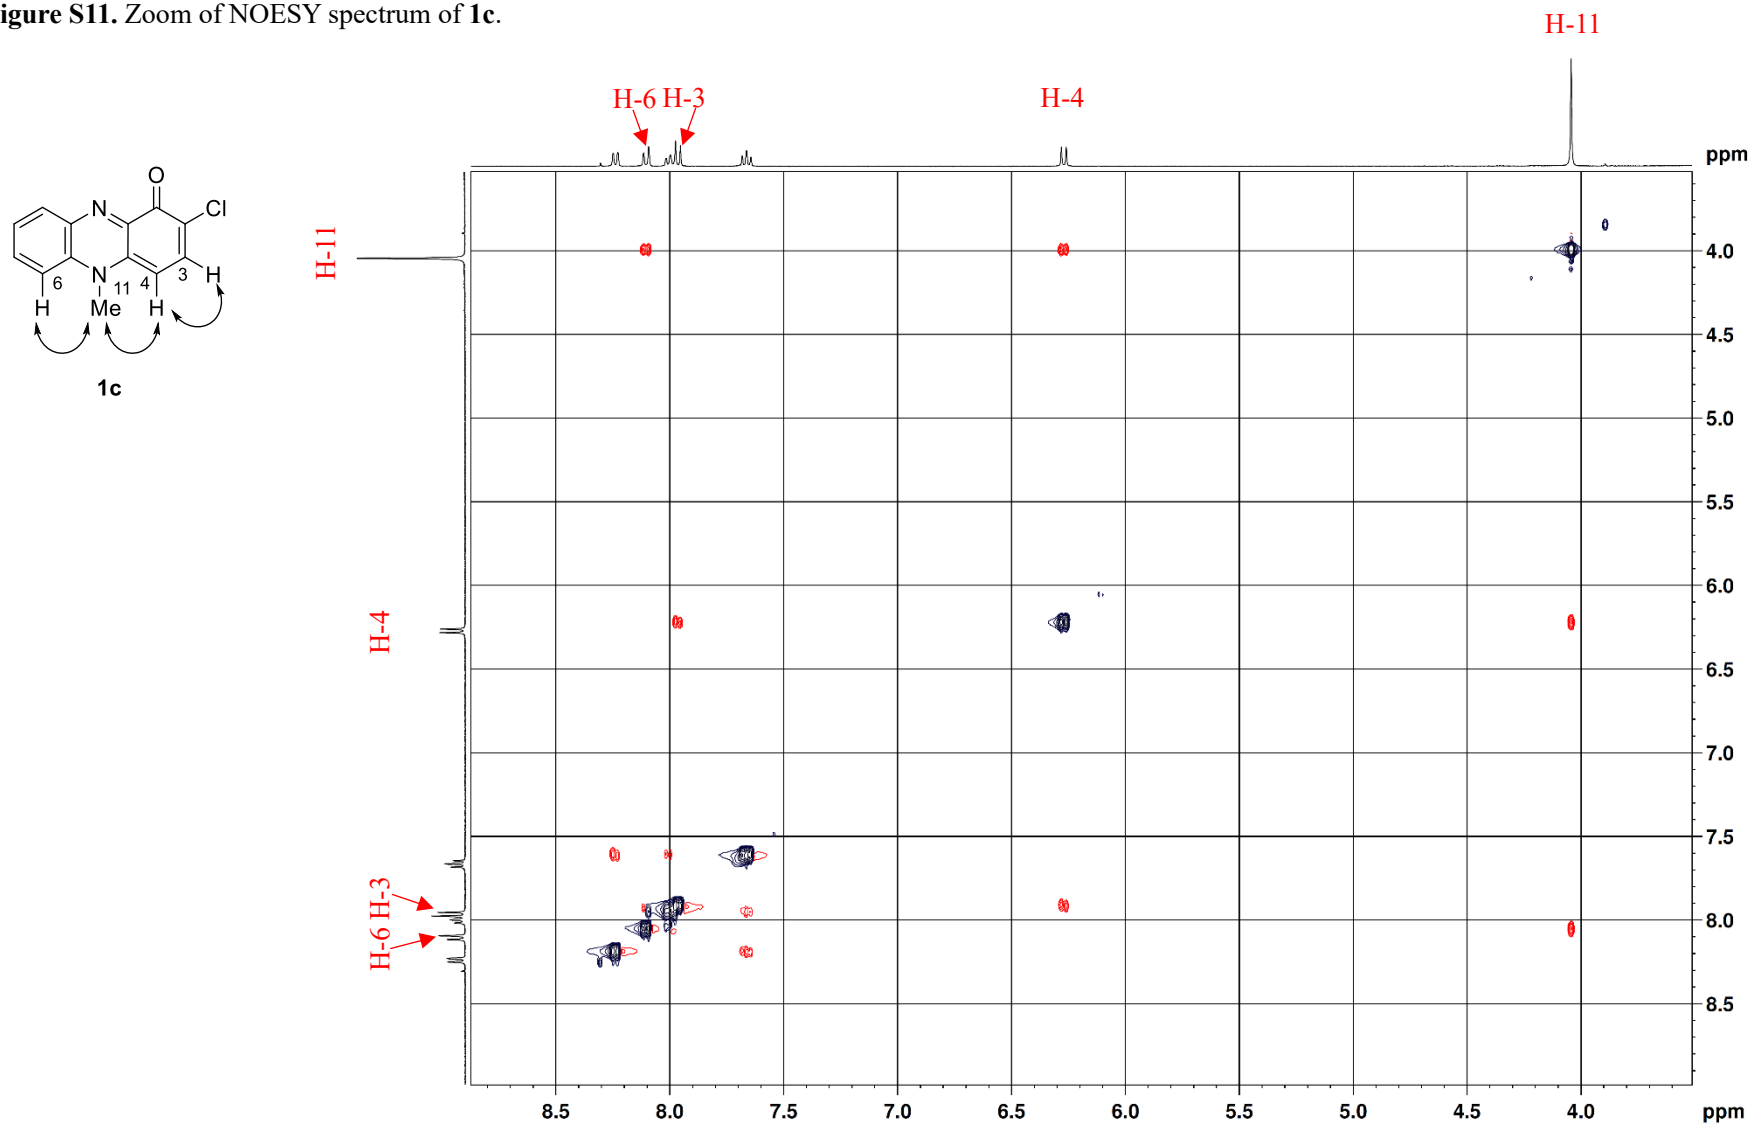

**Figure S12.**  $^1\text{H}$  NMR spectrum (400 MHz,  $\text{CDCl}_3$ , TMS) of **2b**.

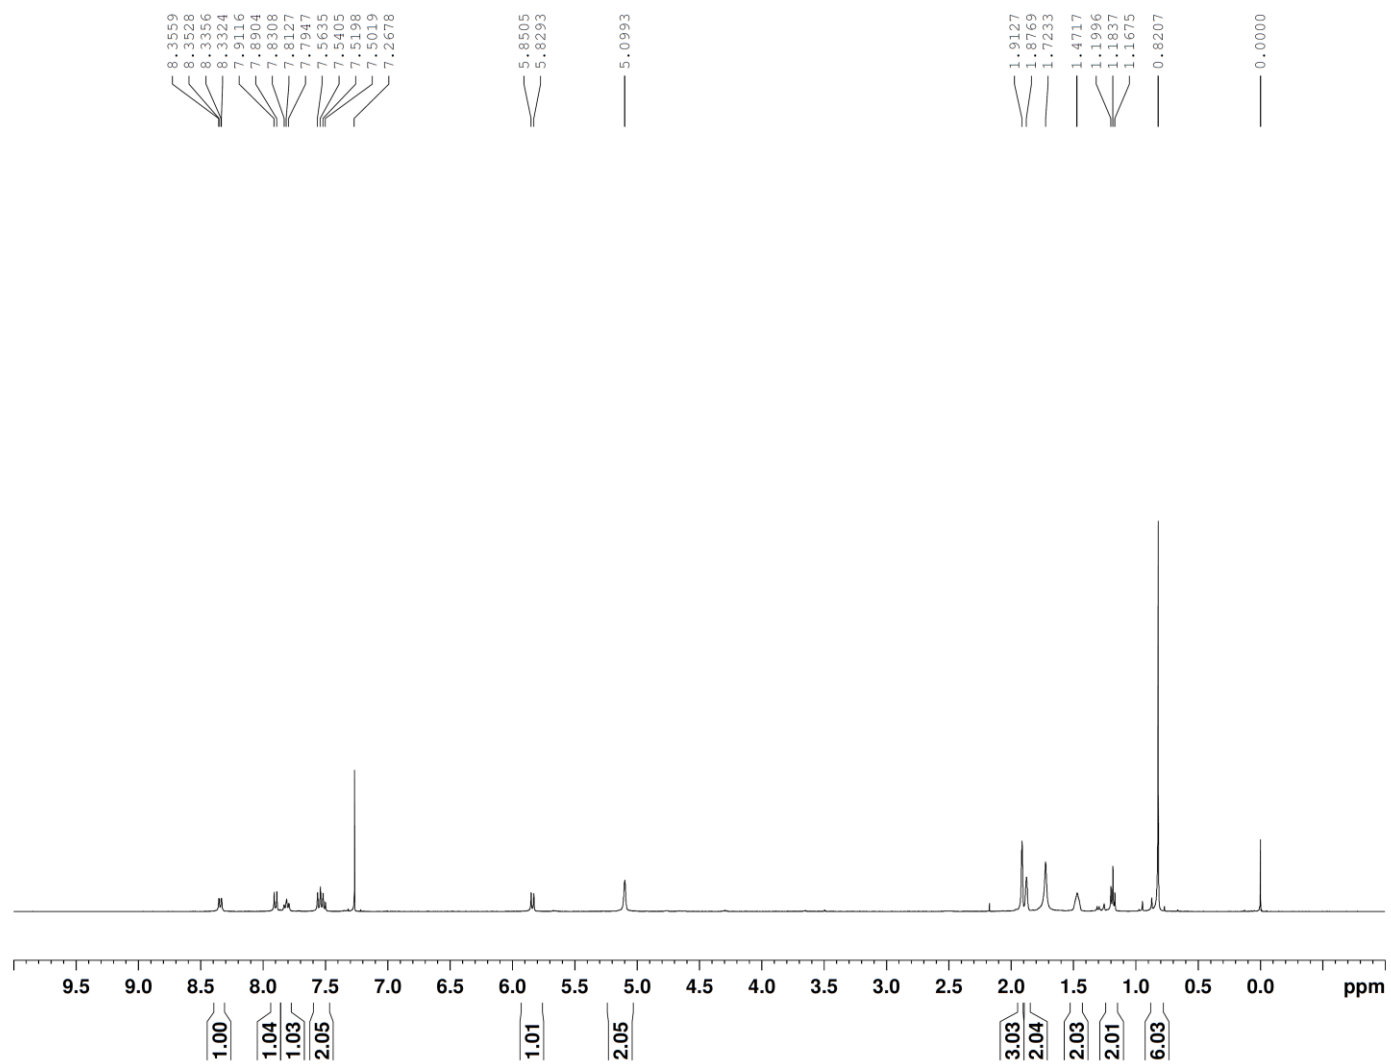

**Figure S13.**  $^{13}\text{C}\{^1\text{H}\}$  NMR spectrum (100 MHz,  $\text{CDCl}_3$ ) of **2b**.

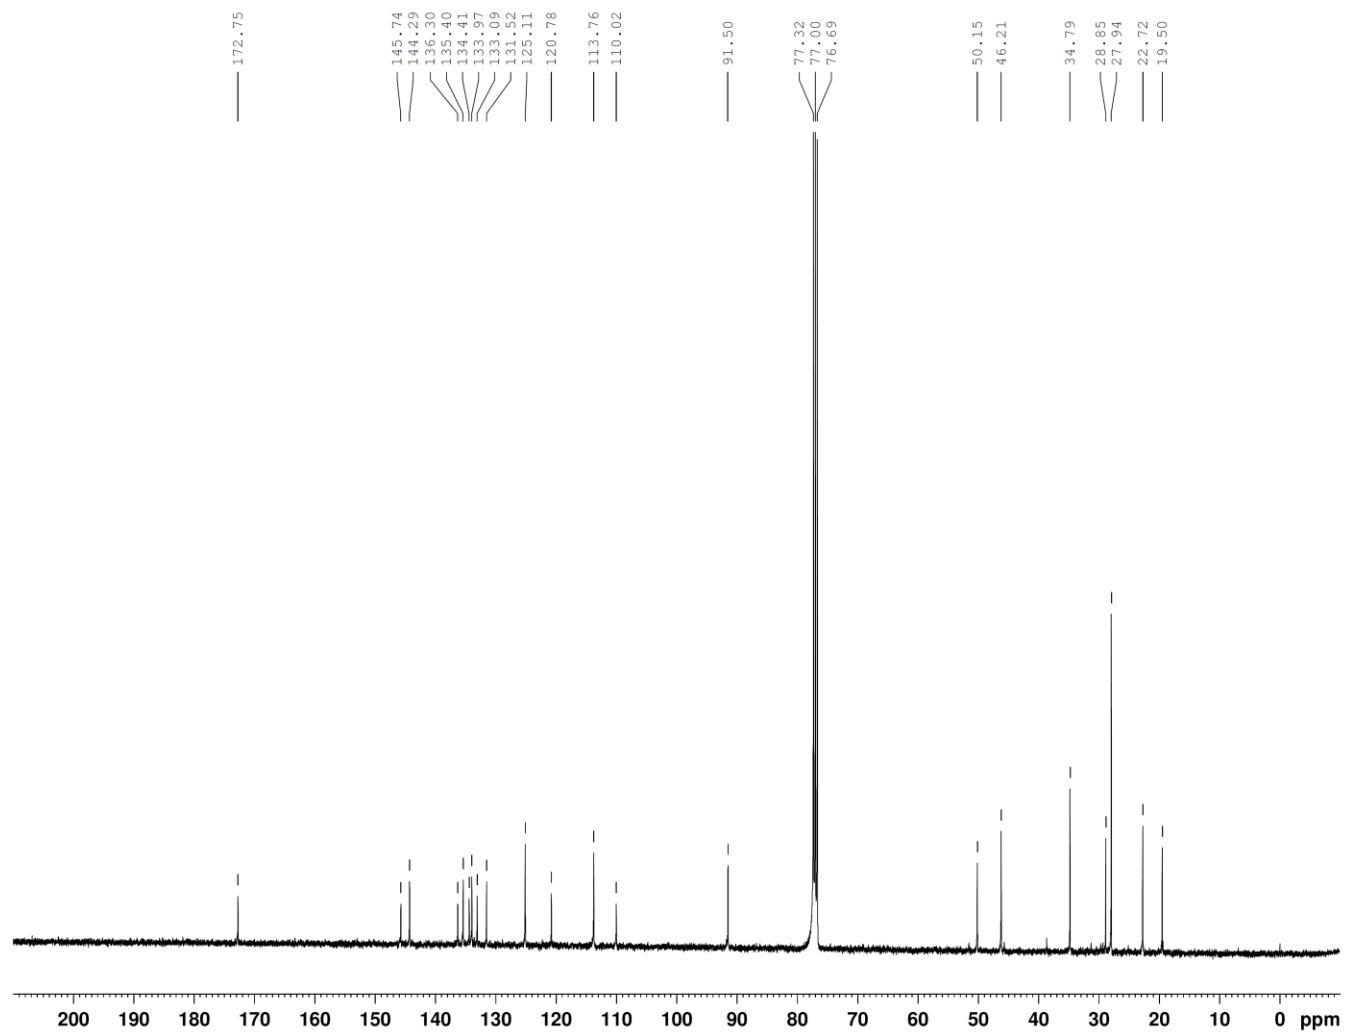

Figure S14.  $^1\text{H}$  NMR spectrum (400 MHz,  $\text{CDCl}_3$ , TMS) of **2c**.

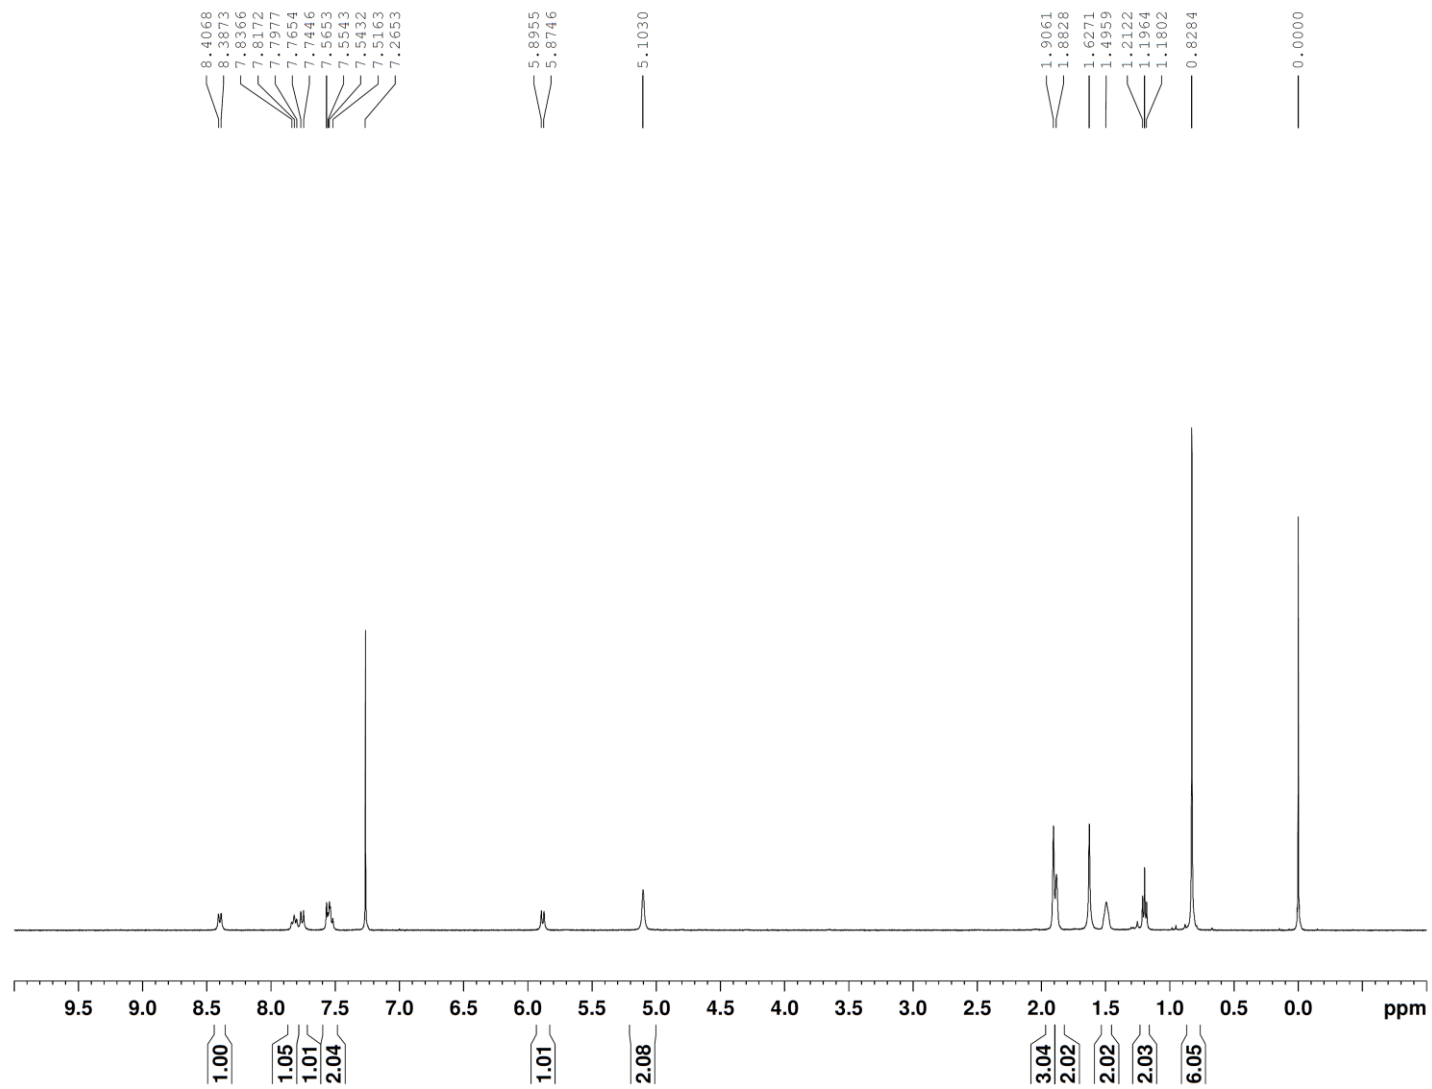



**Figure S15.**  $^{13}\text{C}\{^1\text{H}\}$  NMR spectrum (100 MHz,  $\text{CDCl}_3$ ) of **2c**.

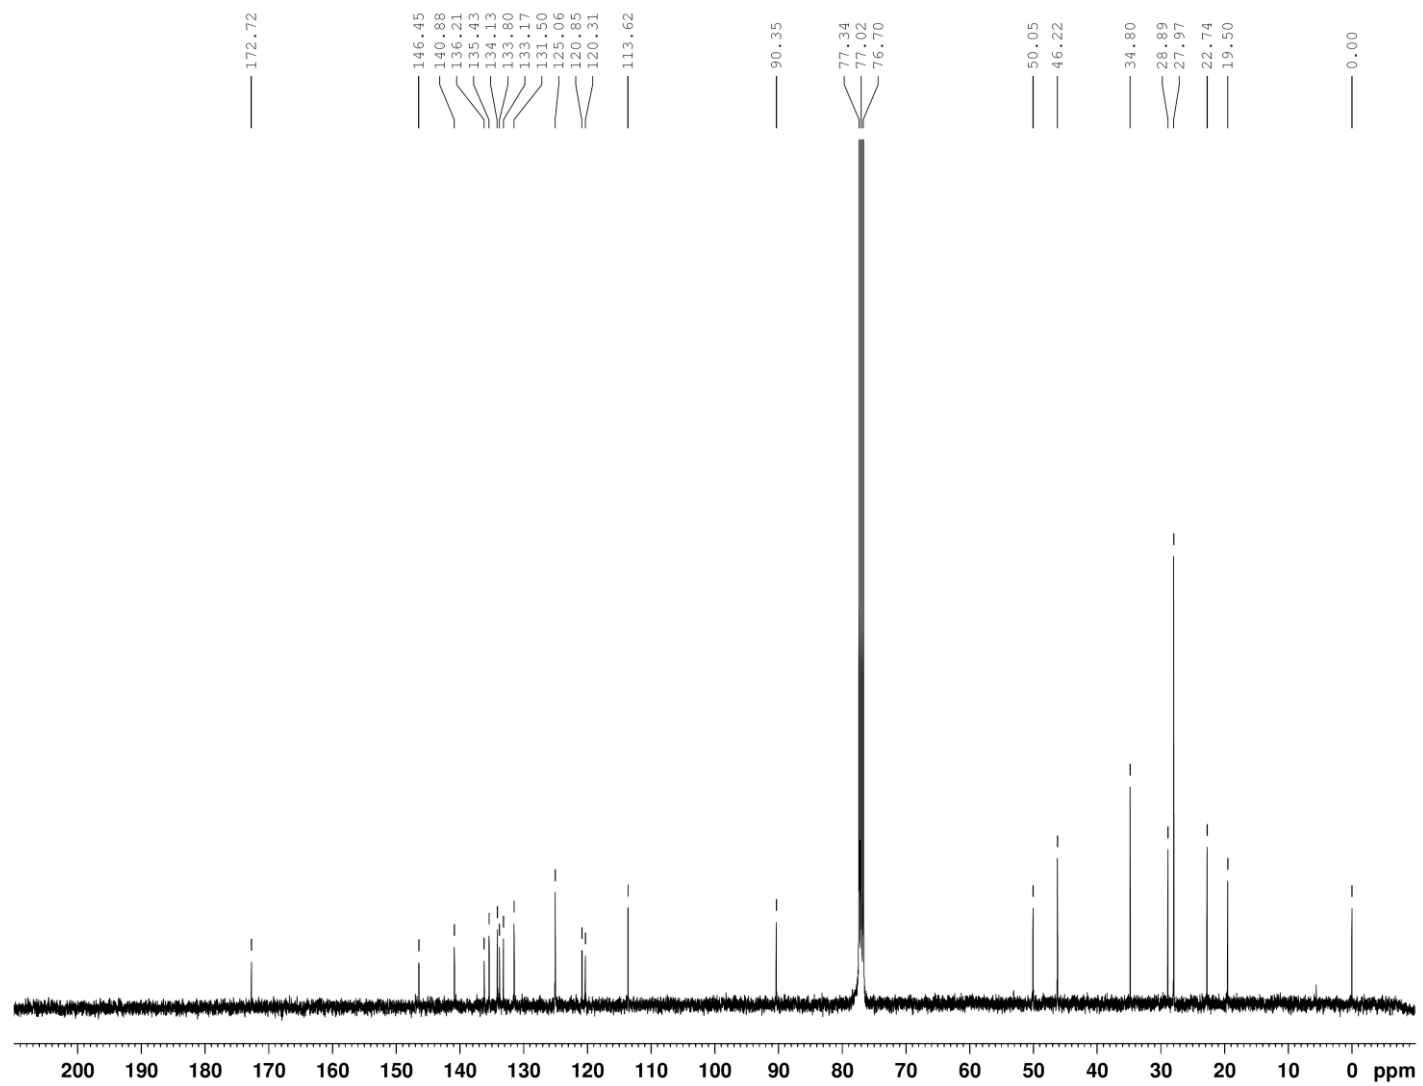

Figure S16. HMBC spectrum of 2c.

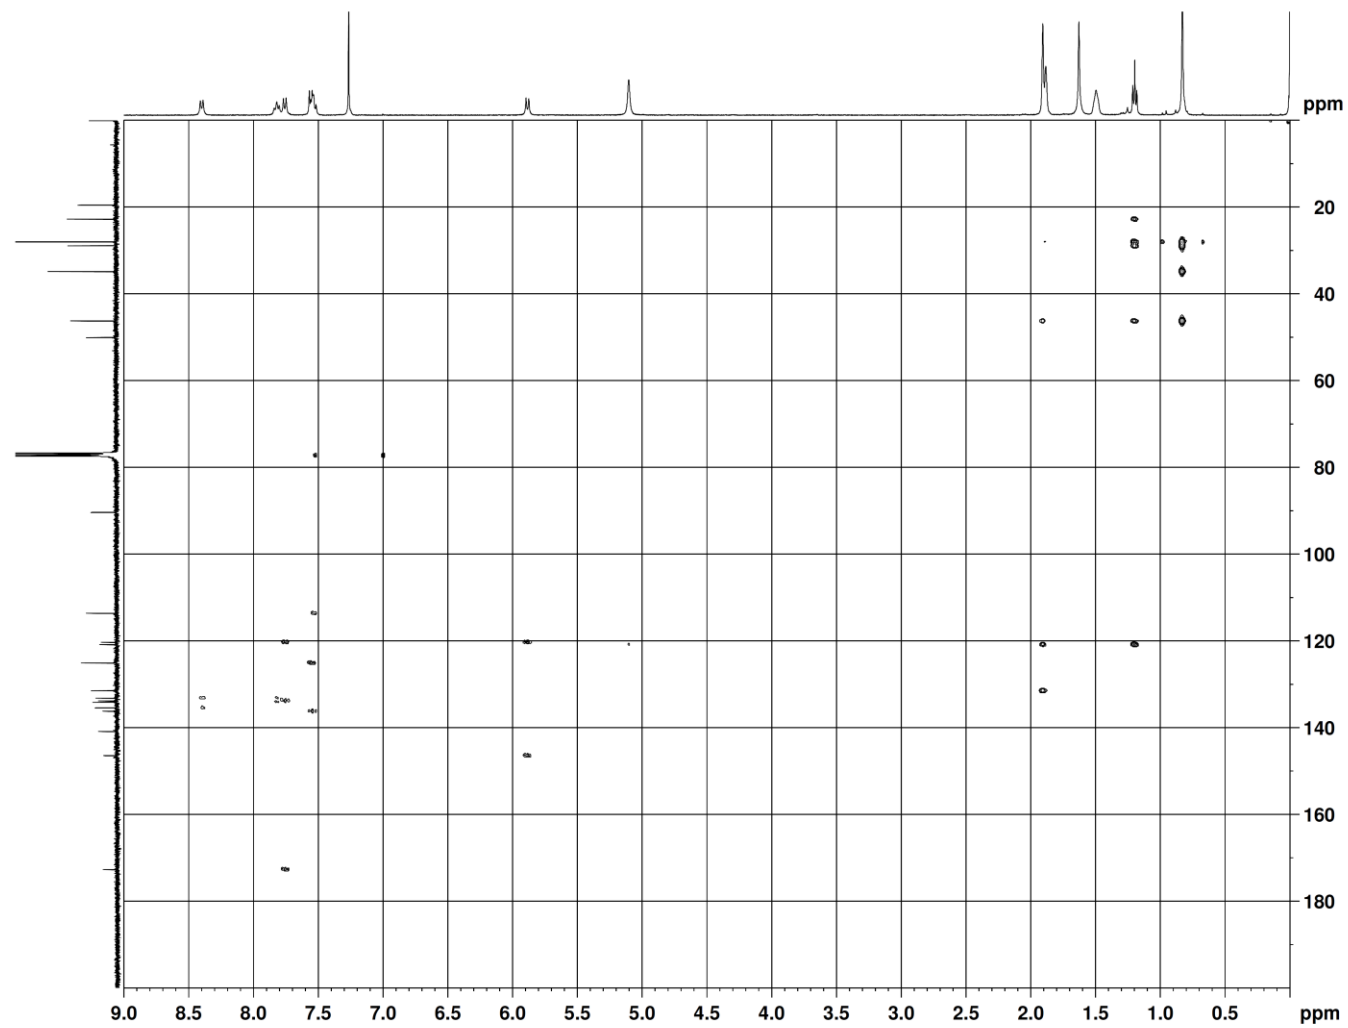

Figure S17. HMQC spectrum of 2c.

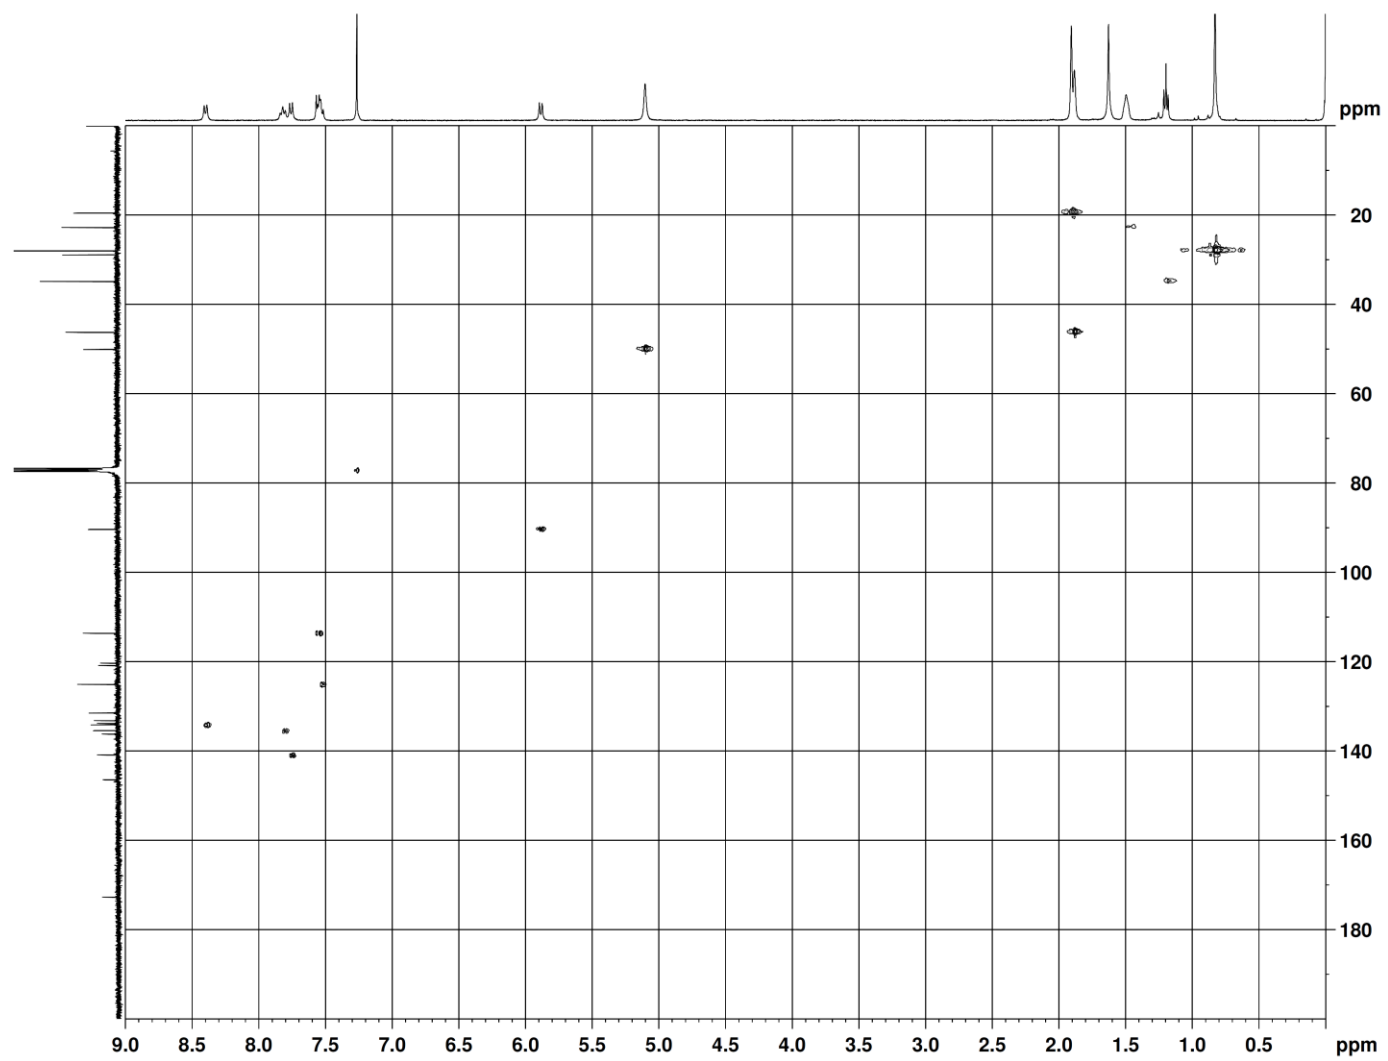

Figure S18. NOESY spectrum of 2c.

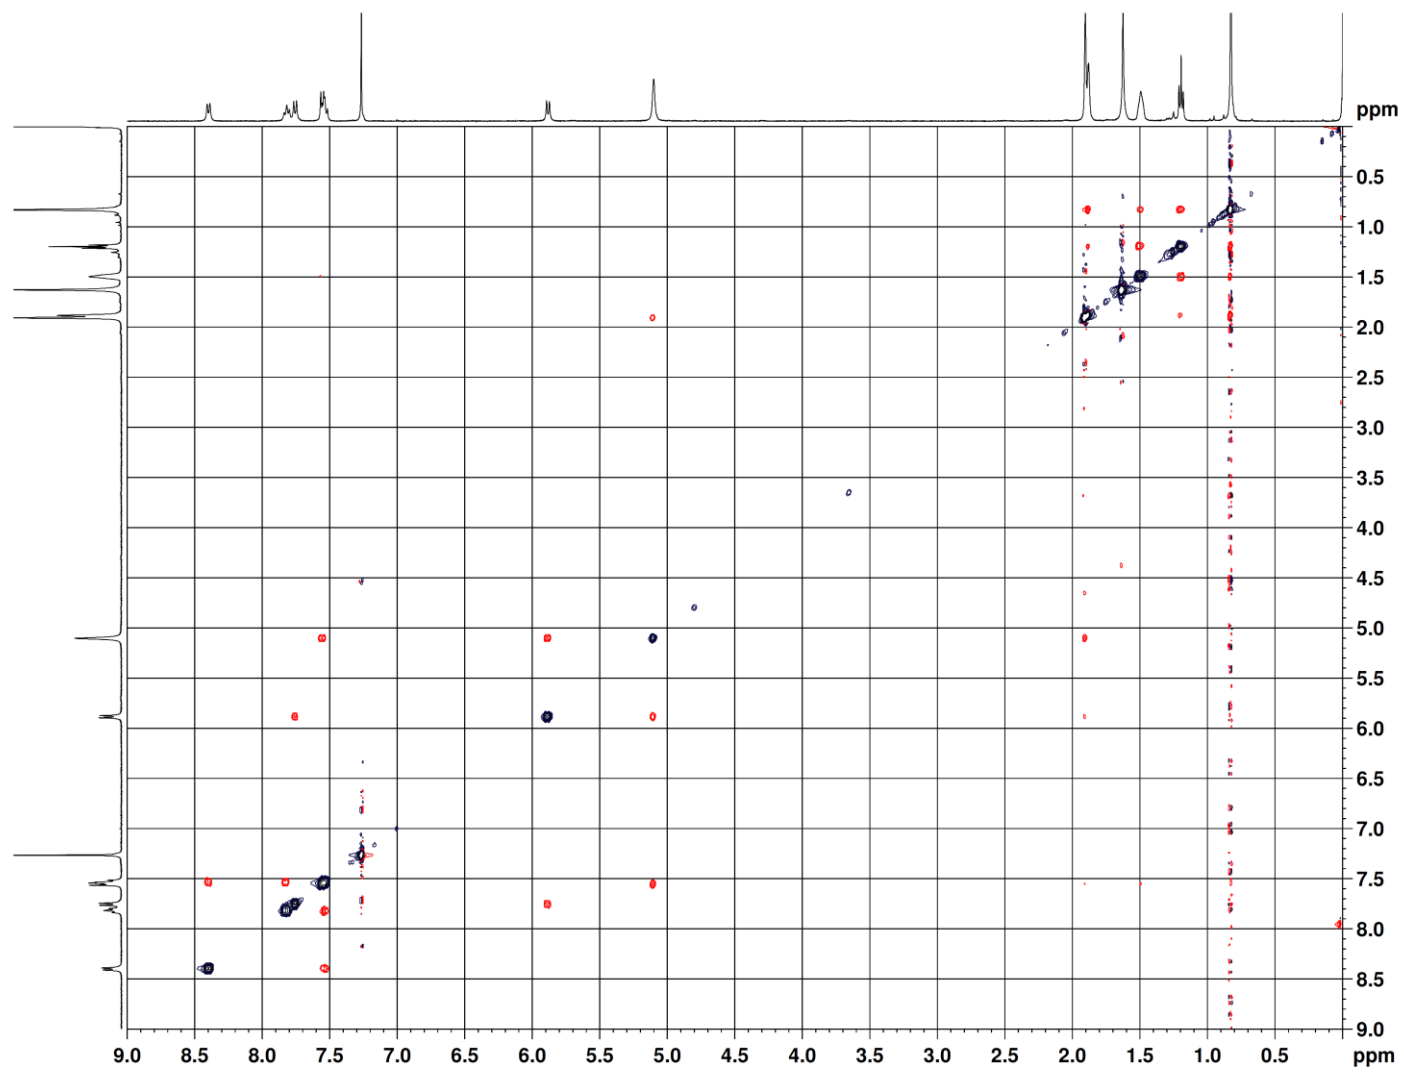

Figure S19. Zoom of NOESY spectrum of 2c.

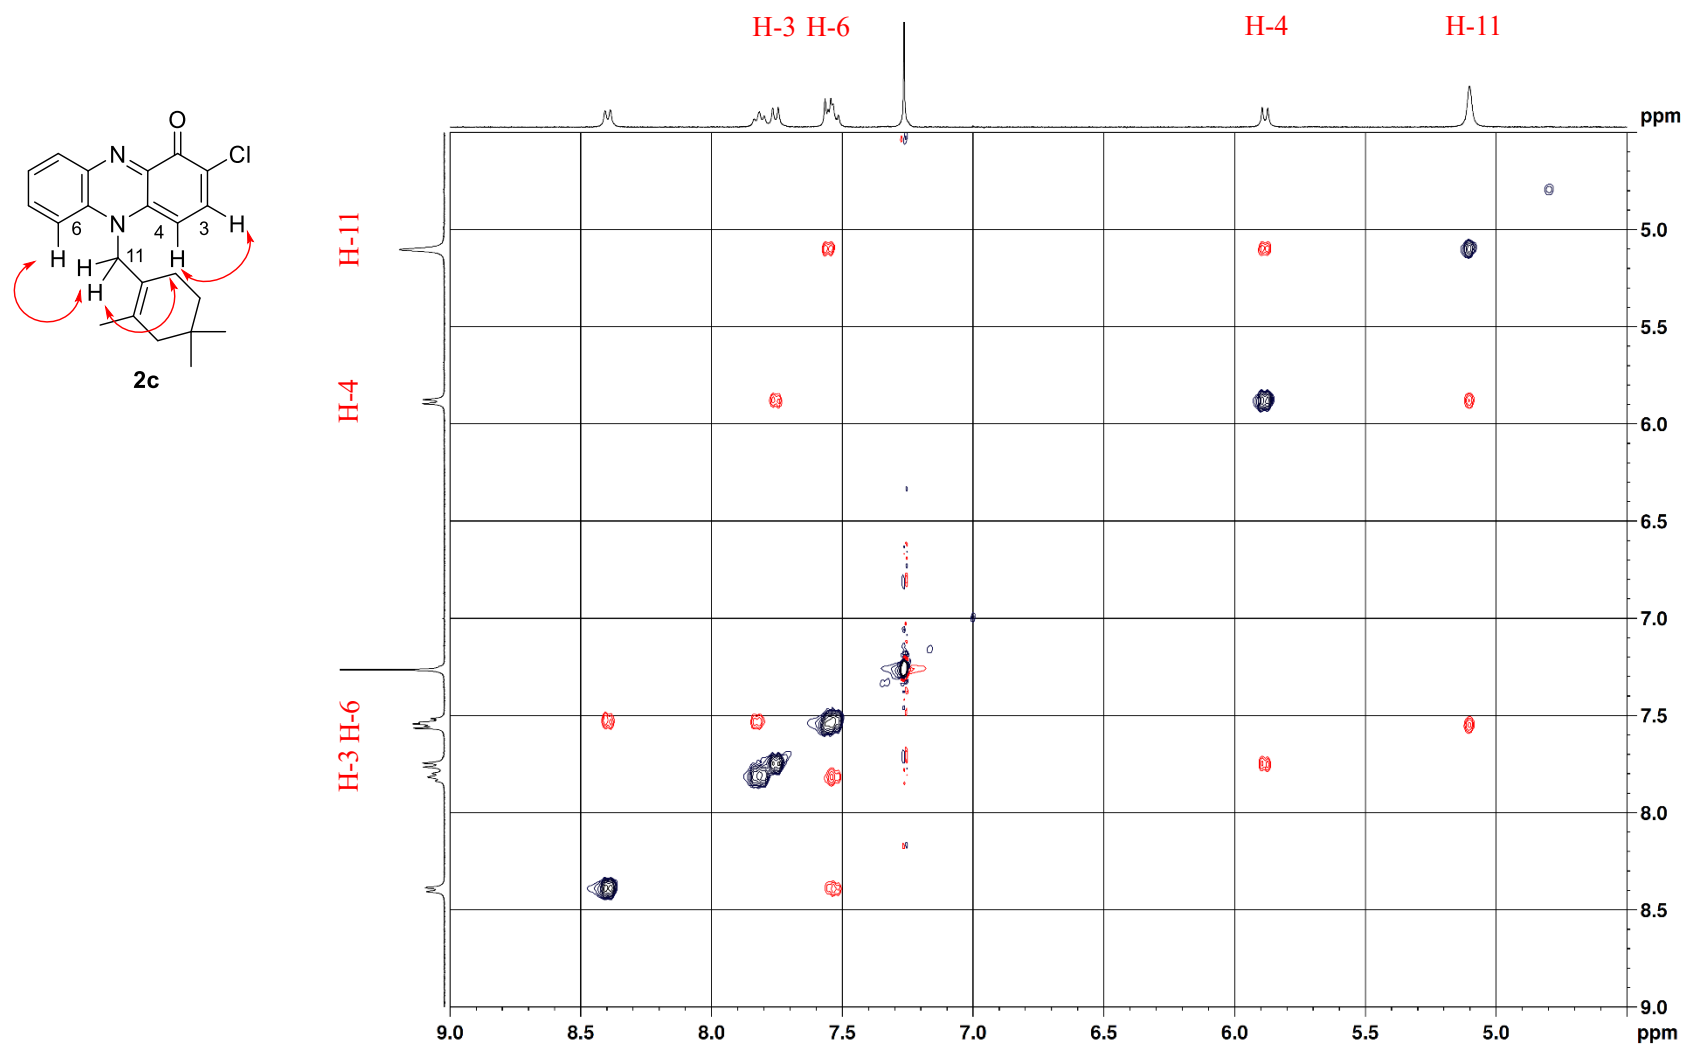

**Figure S20.**  $^1\text{H}$  NMR spectrum (400 MHz,  $\text{CD}_3\text{OD}$ ) of **3b**.

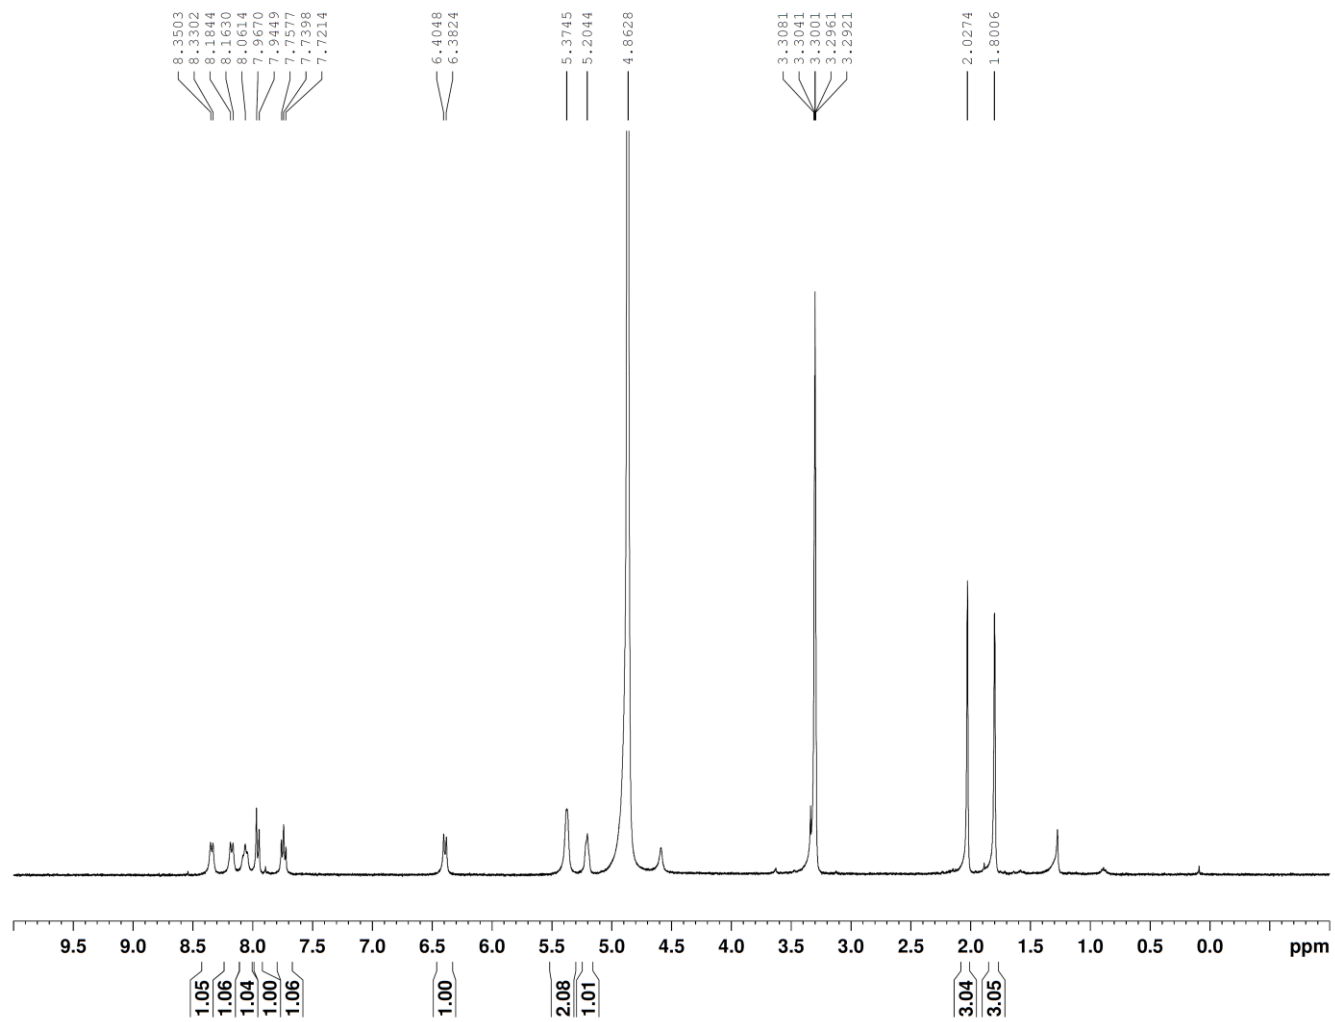

**Figure S21.**  $^{13}\text{C}\{^1\text{H}\}$  NMR spectrum (100 MHz,  $\text{CD}_3\text{OD}$ ) of **3b**.

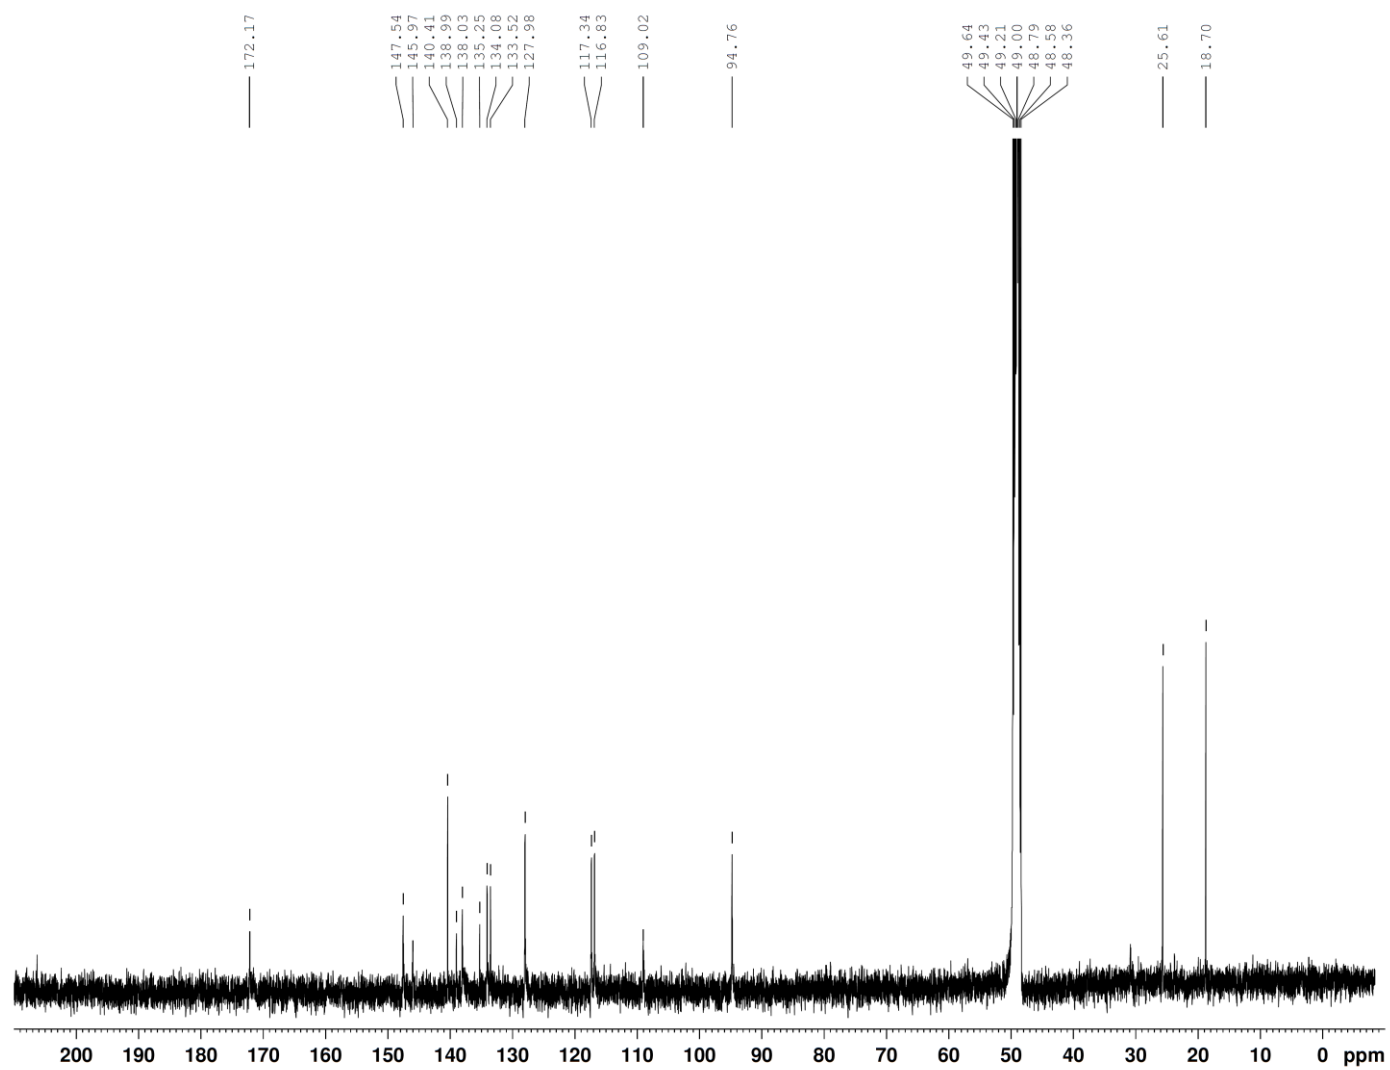

Figure S22.  $^1\text{H}$  NMR spectrum (400 MHz,  $\text{CD}_3\text{OD}$ ) of **3c**.

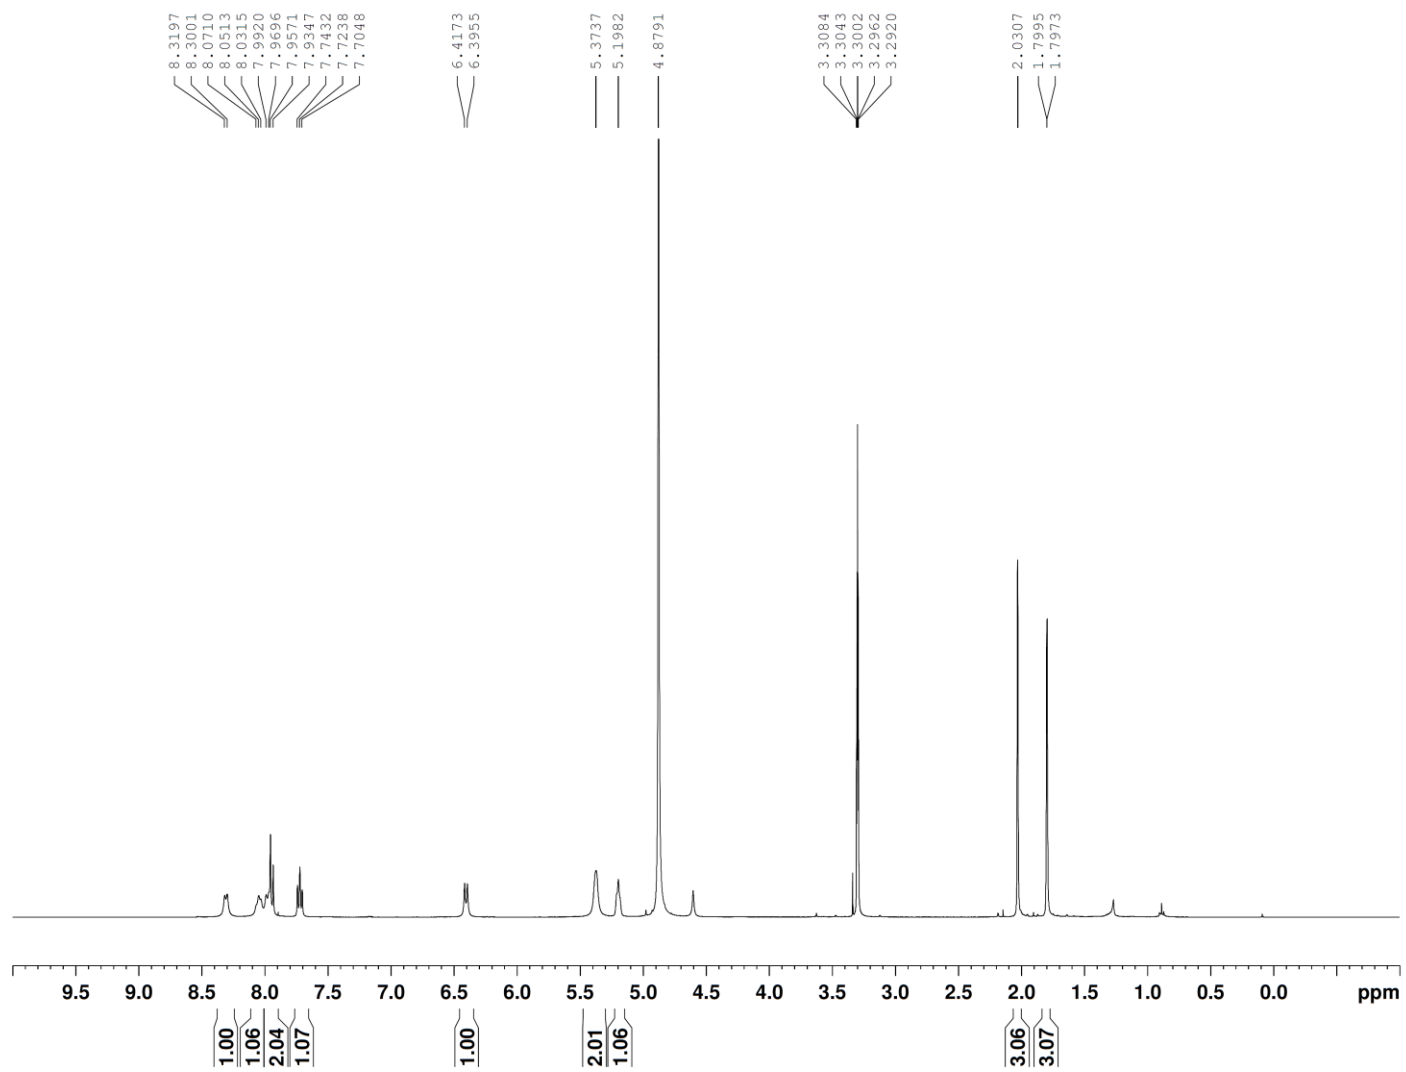



**Figure S23.**  $^{13}\text{C}\{^1\text{H}\}$  NMR spectrum (100 MHz,  $\text{CD}_3\text{OD}$ ) of **3c**.

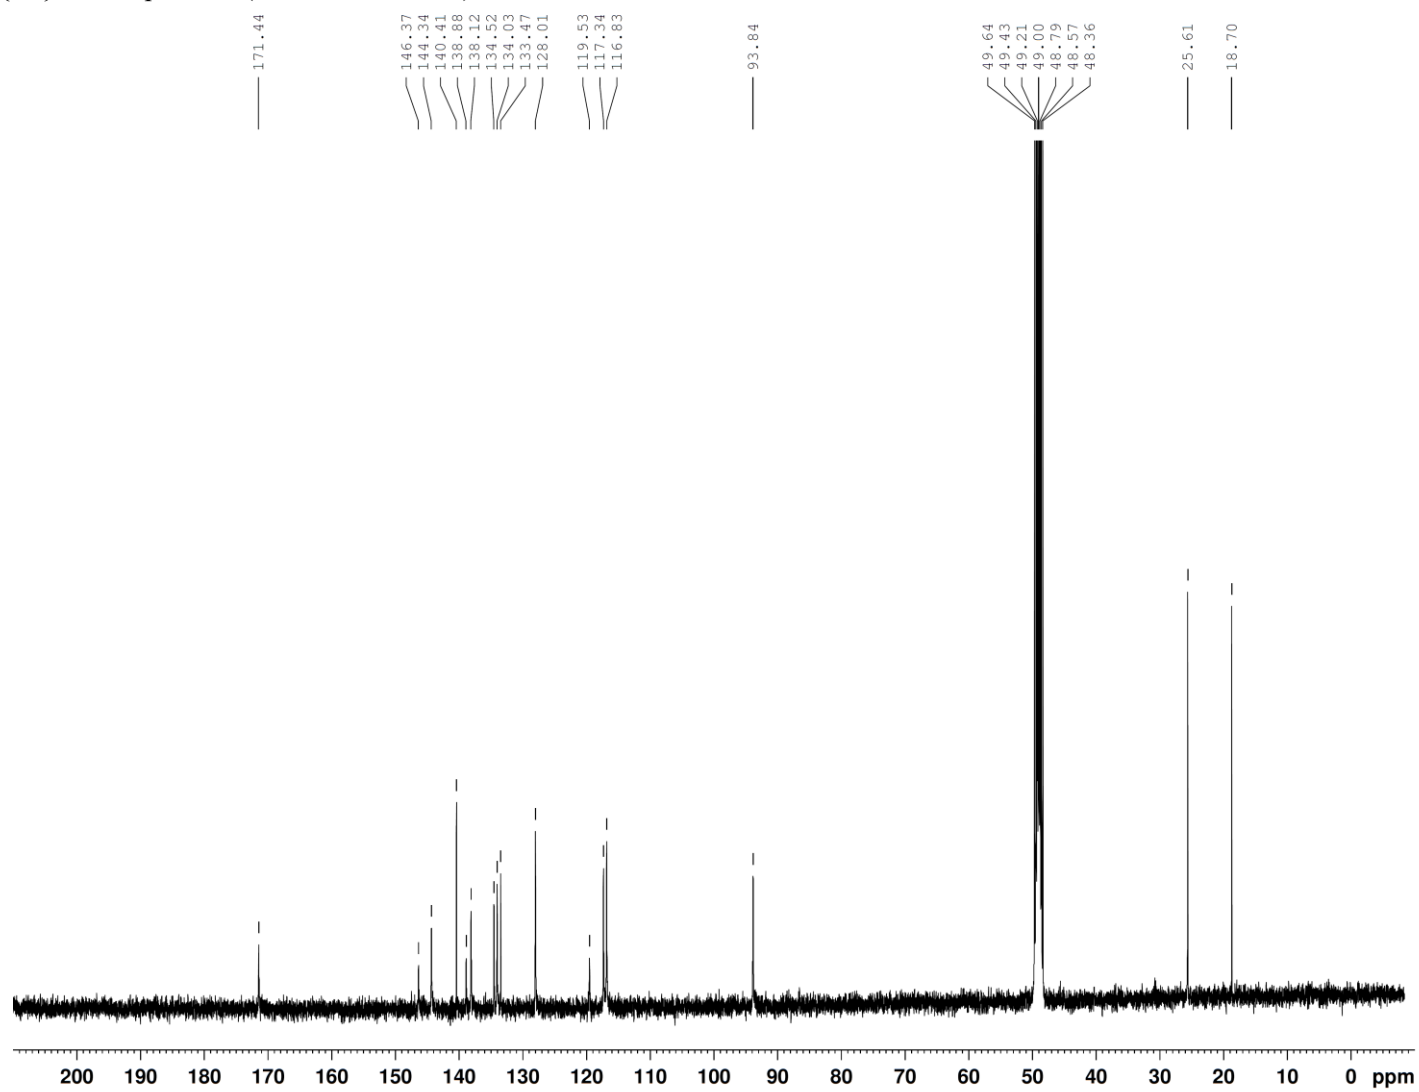

Figure S24. HMBC spectrum of **3c**.

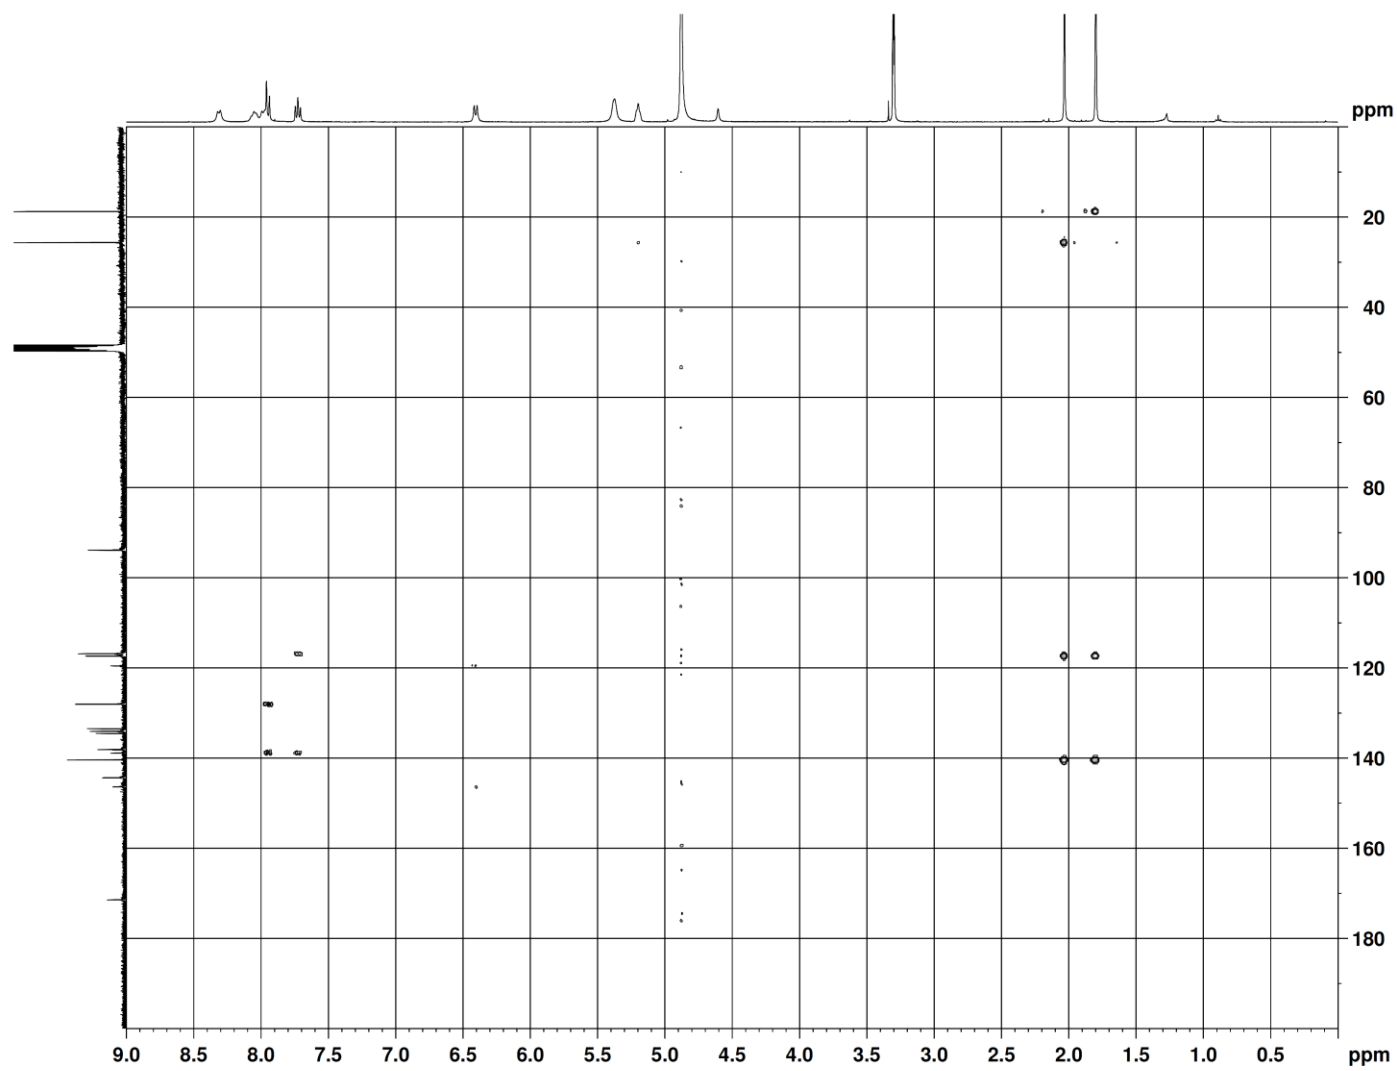

Figure S25. HMQC spectrum of **3c**.

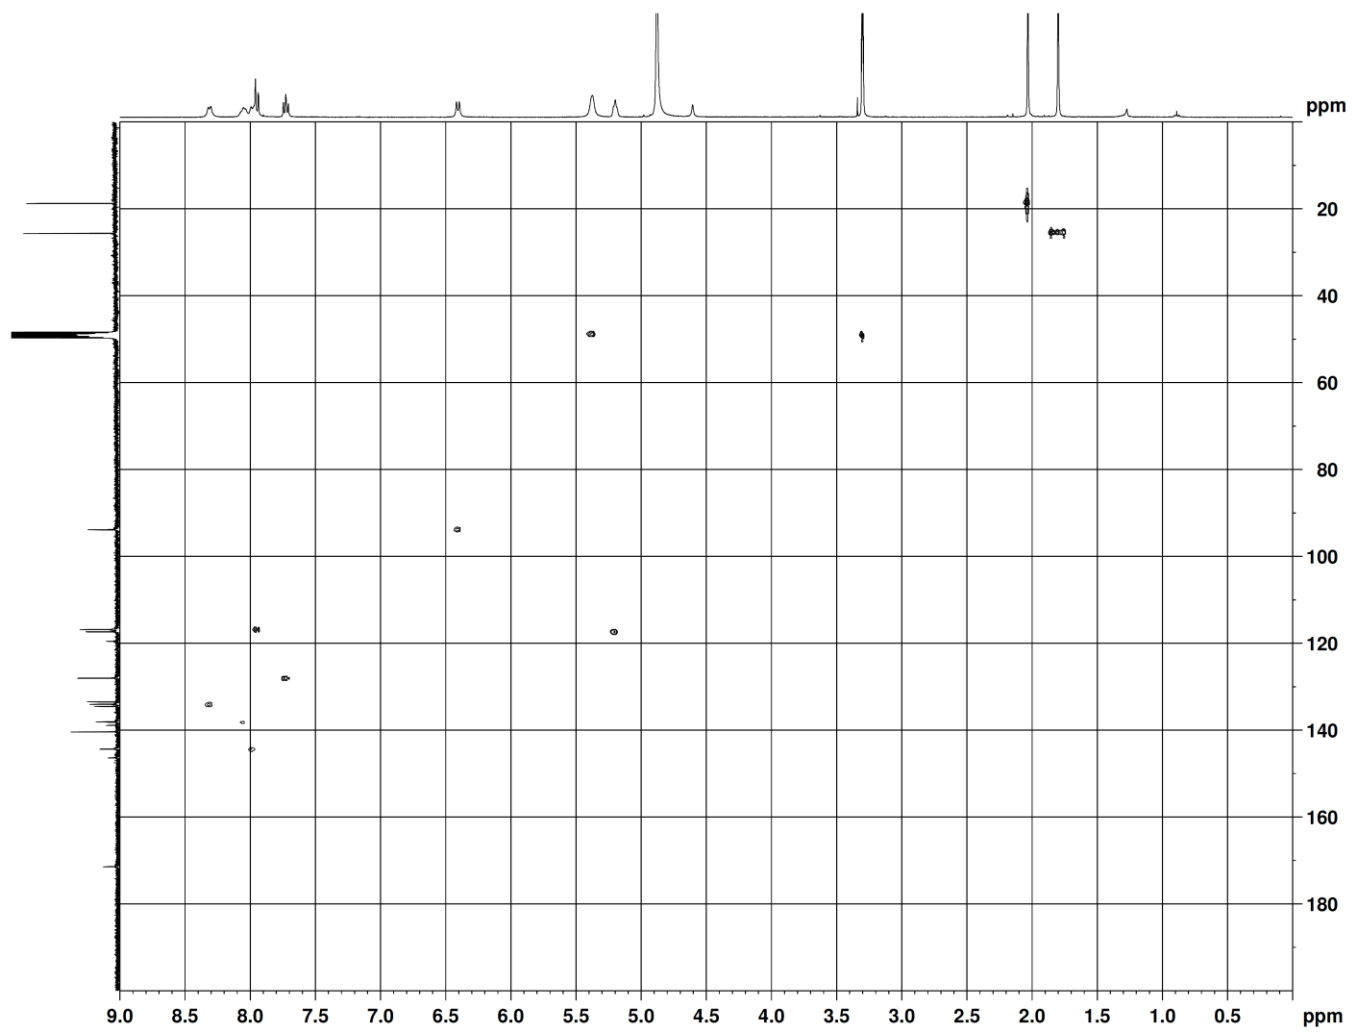

Figure S26. NOESY spectrum of **3c**.

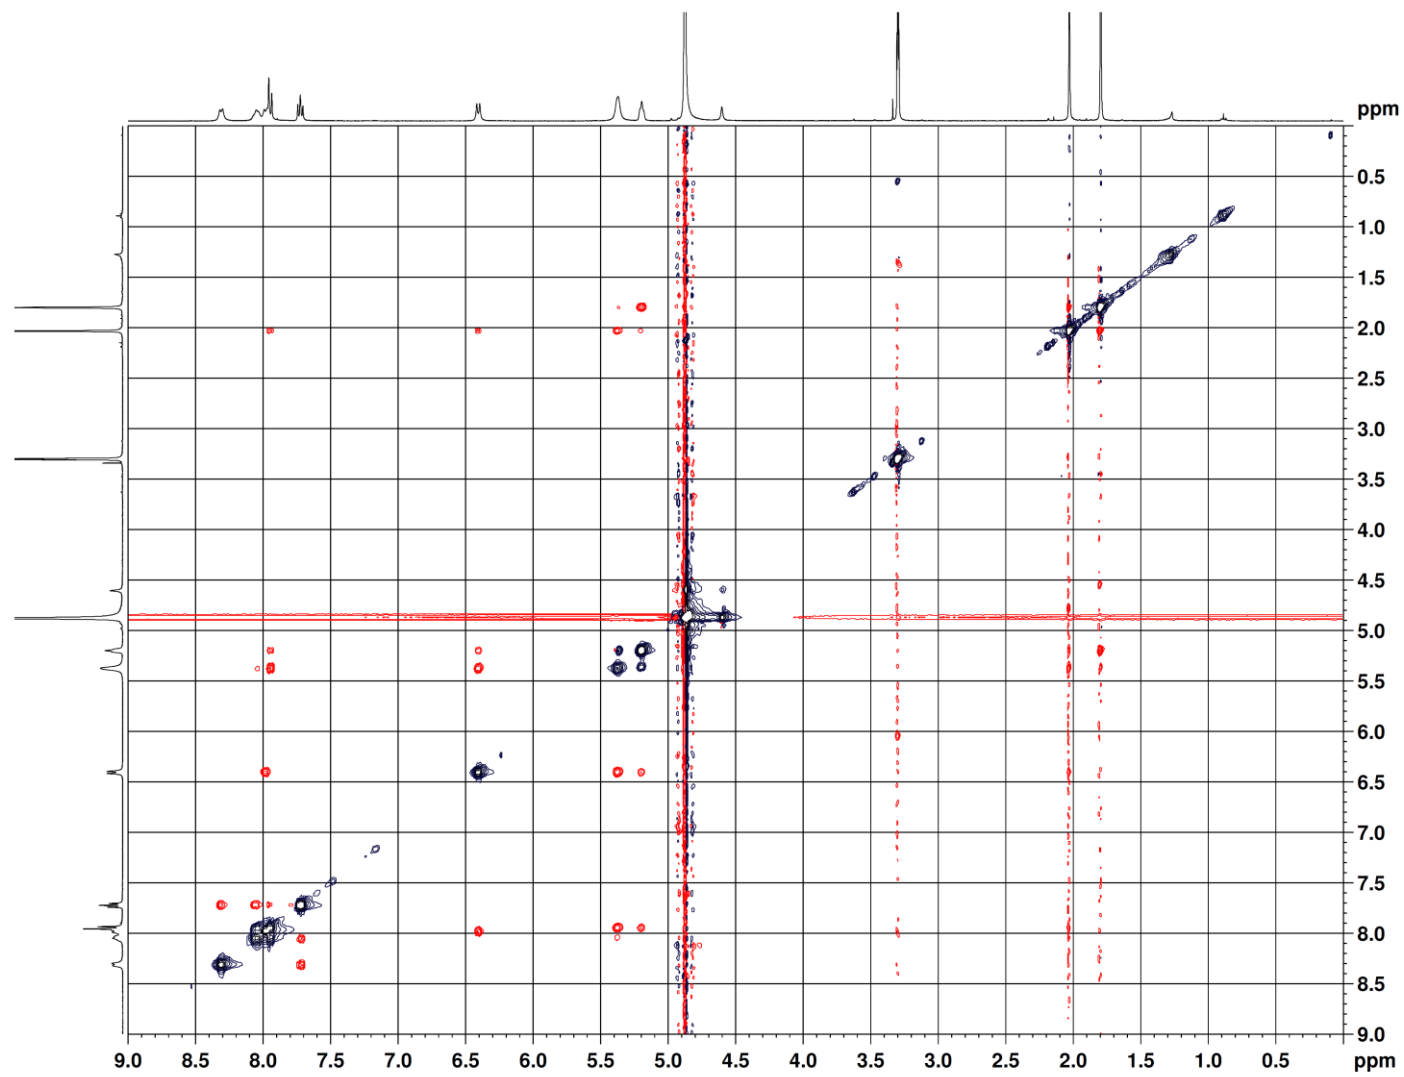

Figure S27.  $^1\text{H}$  NMR spectrum (400 MHz,  $\text{CDCl}_3$ , TMS) of 7.

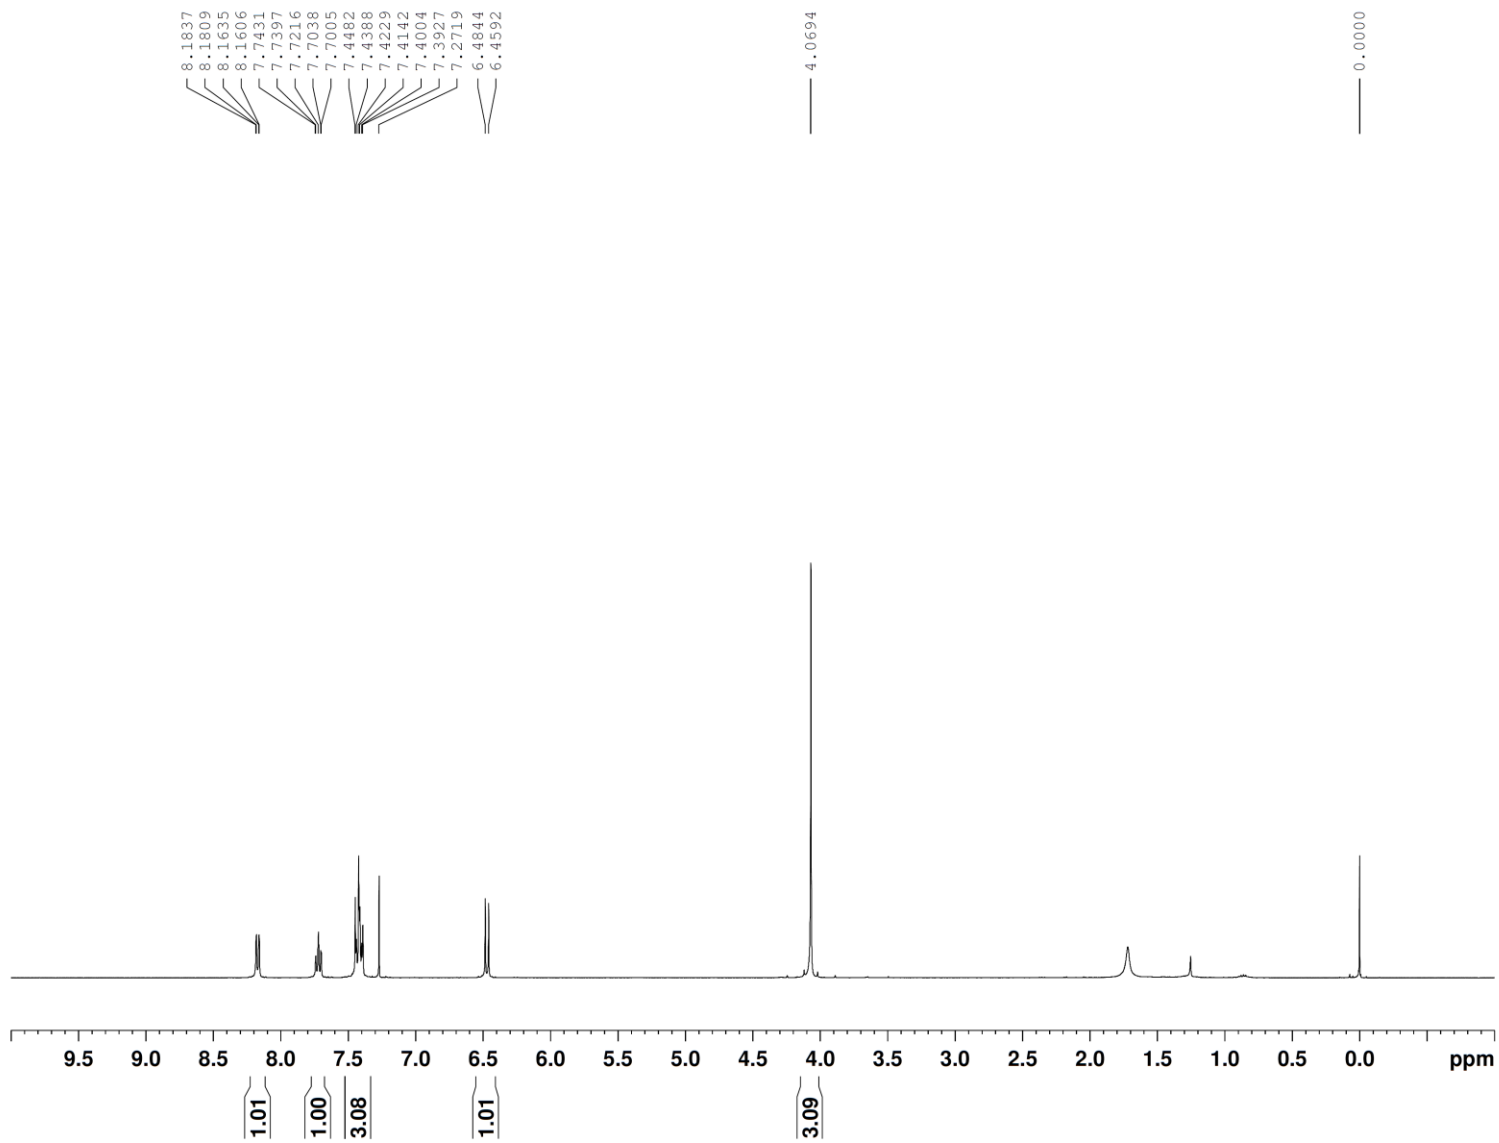

Figure S28.  $^{13}\text{C}\{^1\text{H}\}$  NMR spectrum (100 MHz,  $\text{CDCl}_3$ ) of **7**.

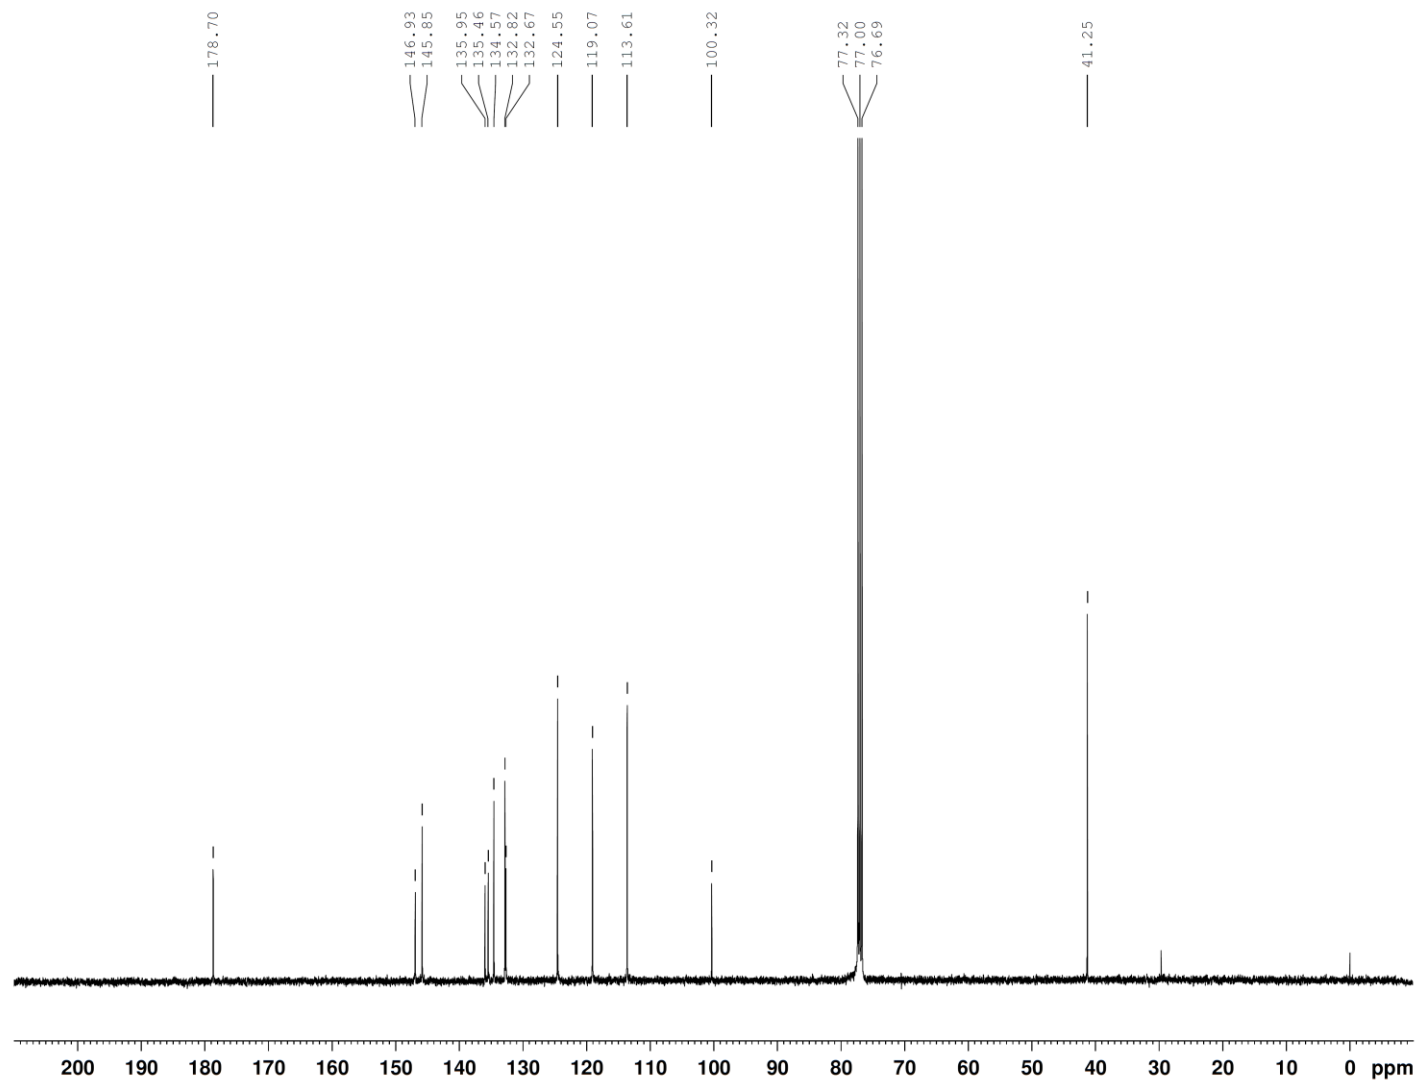

Figure S29. HMBC spectrum of 7.

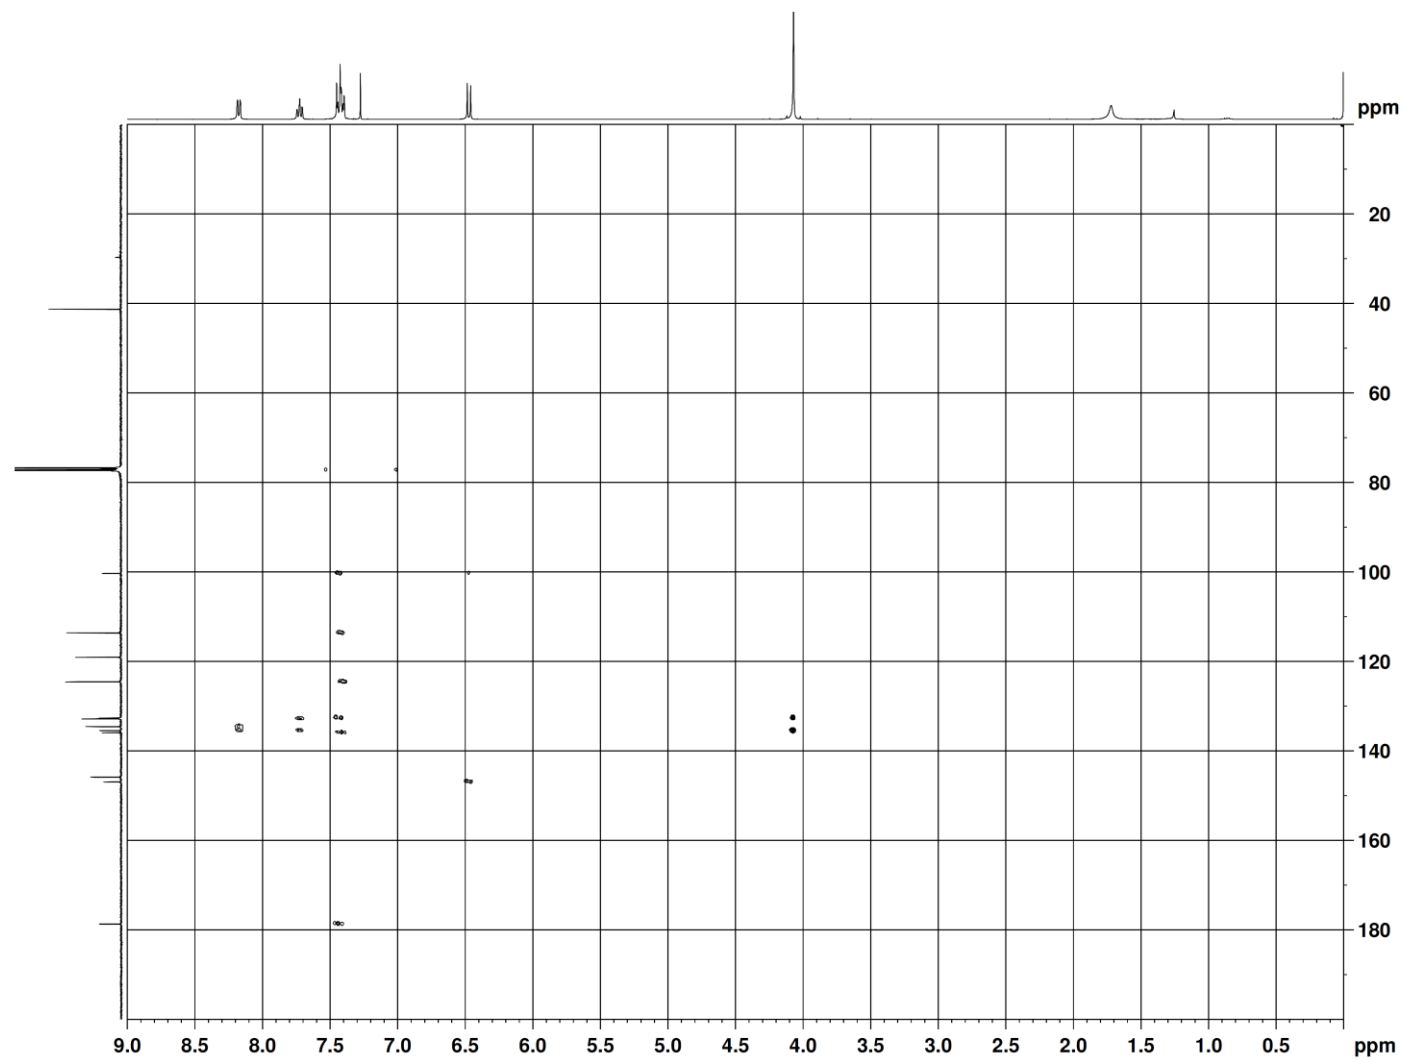

Figure S30. HMQC spectrum of 7.

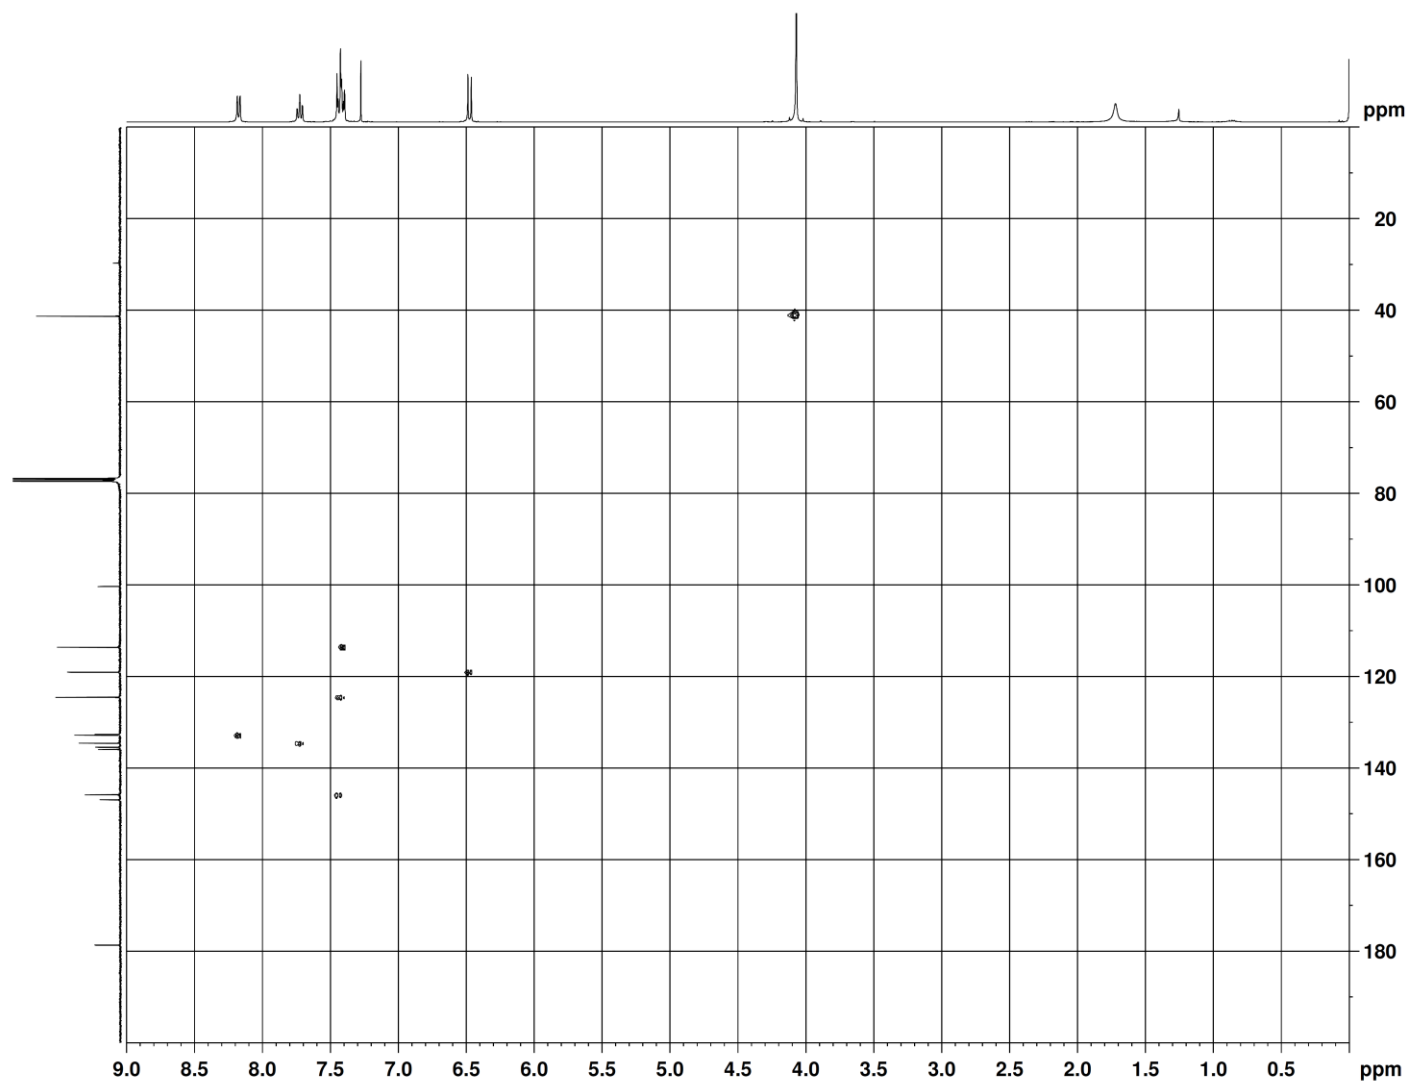



Figure S31. NOESY spectrum of 7.

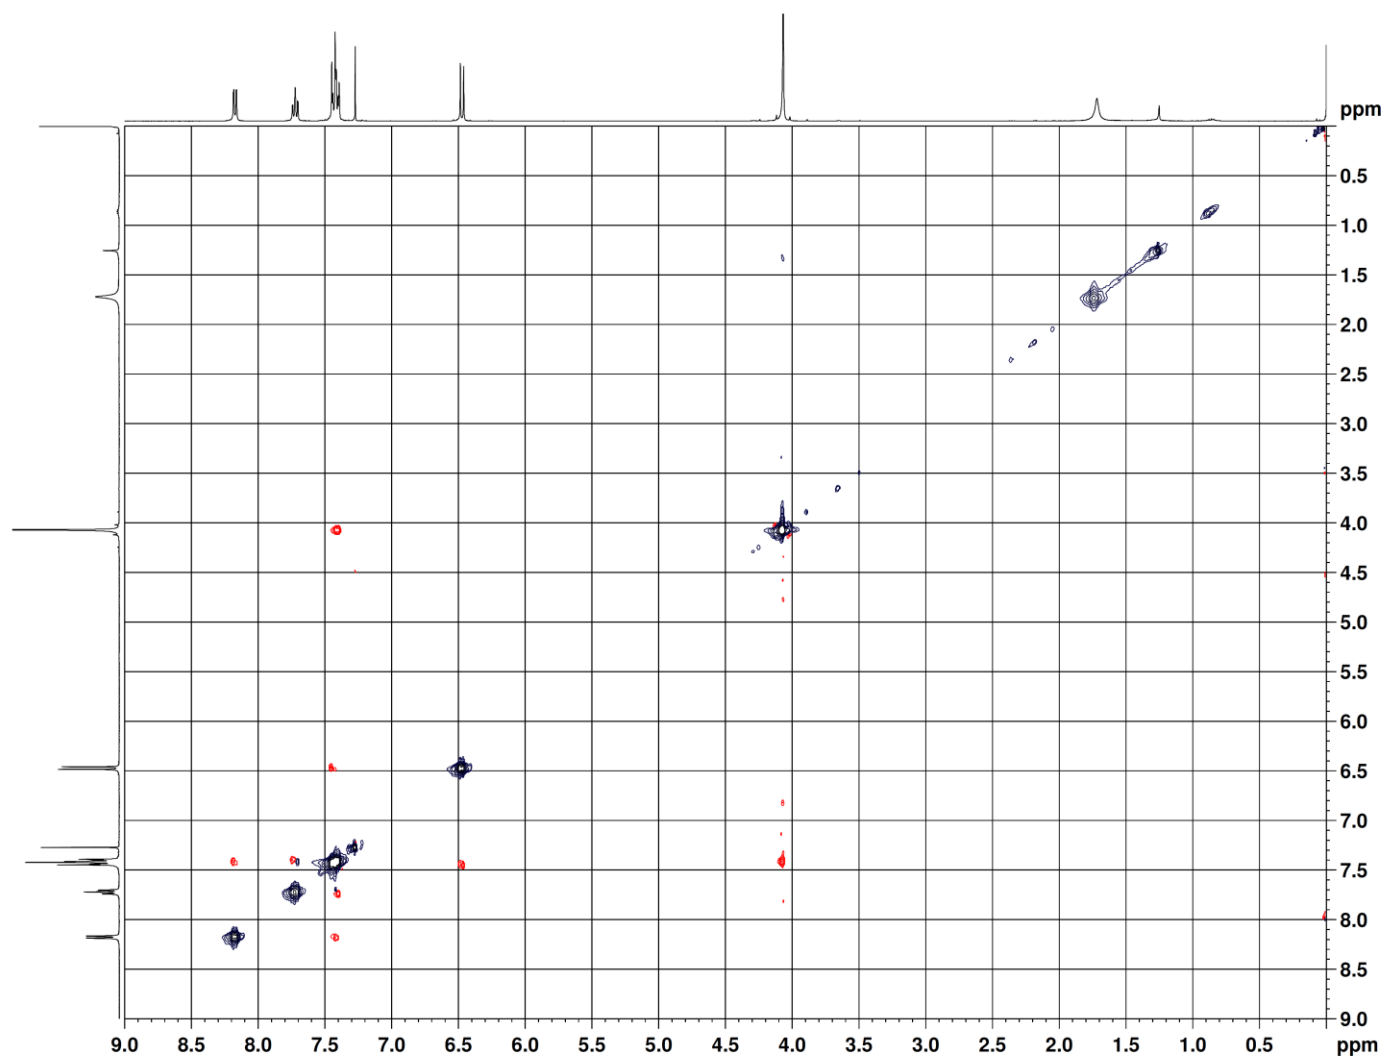

Figure S32. Zoom of NOESY spectrum of 7 (8.5 ppm – 3.0 ppm).

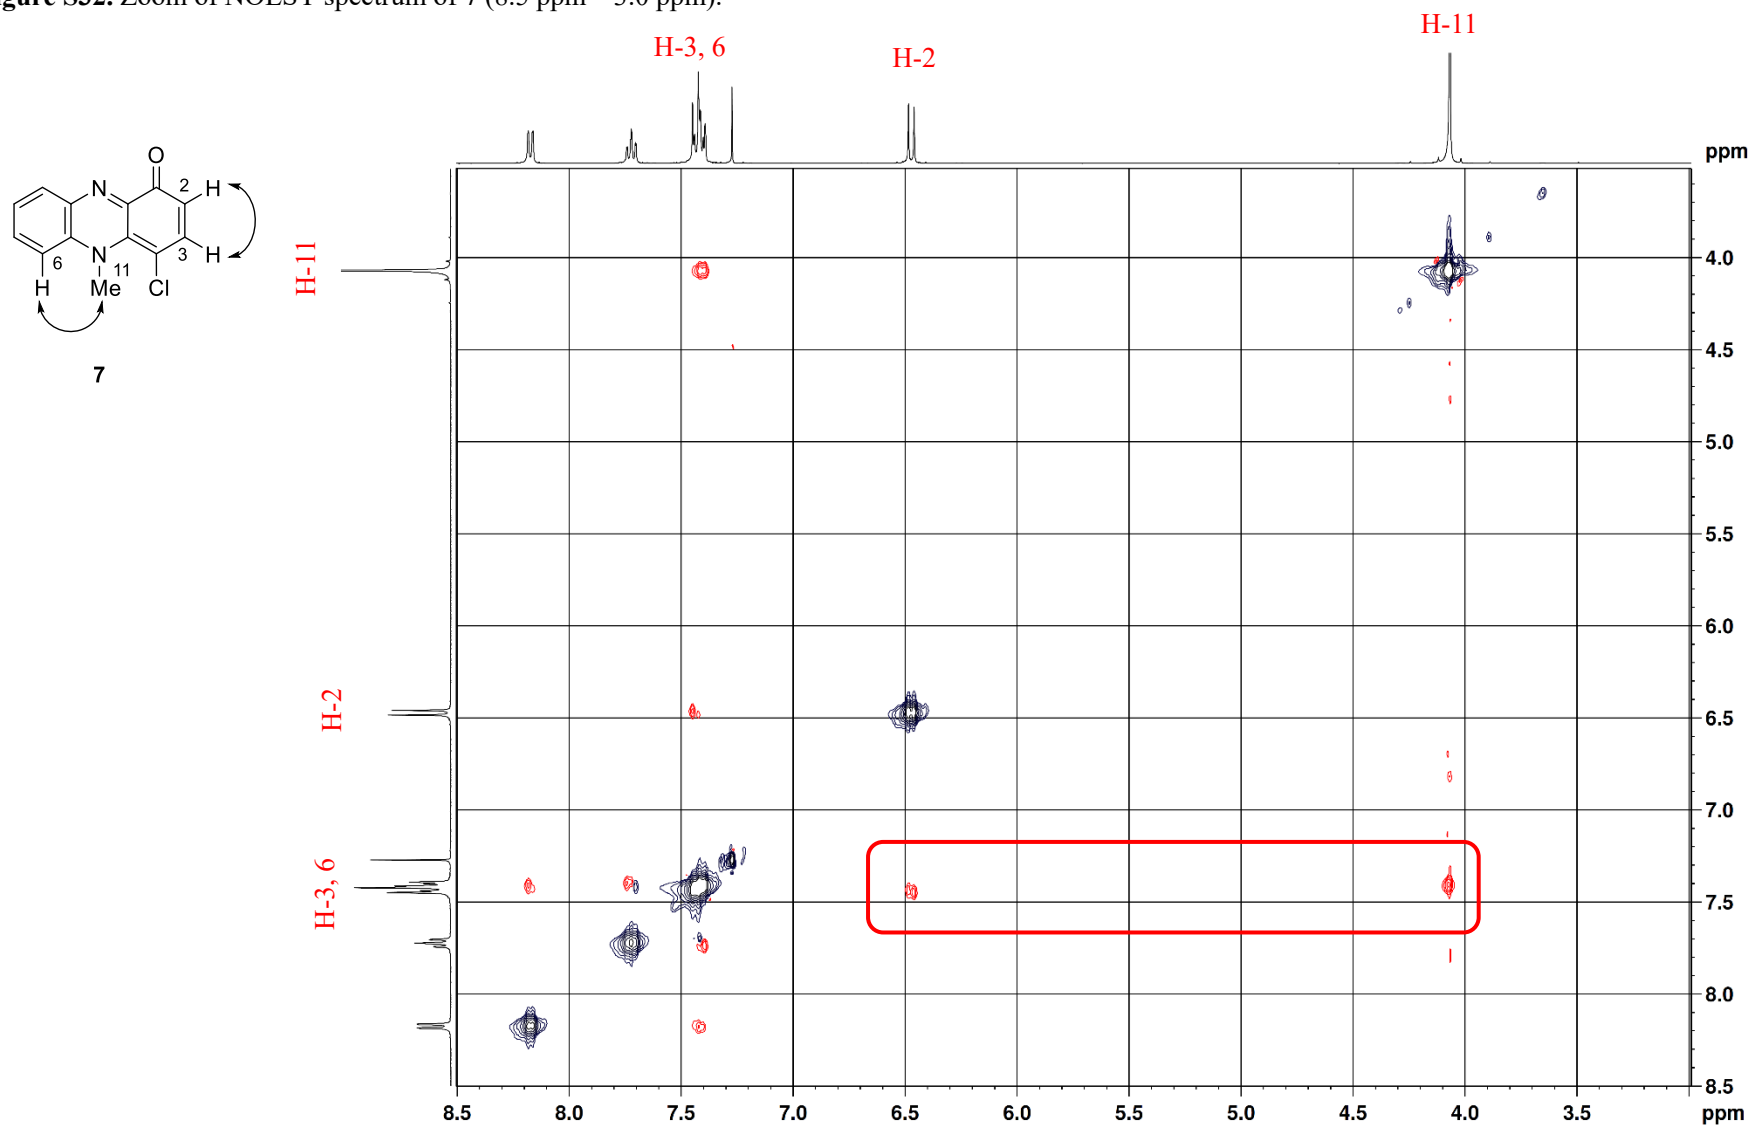

Figure S33. Zoom of NOESY spectrum of 7 (6.6 ppm – 4.0 ppm).

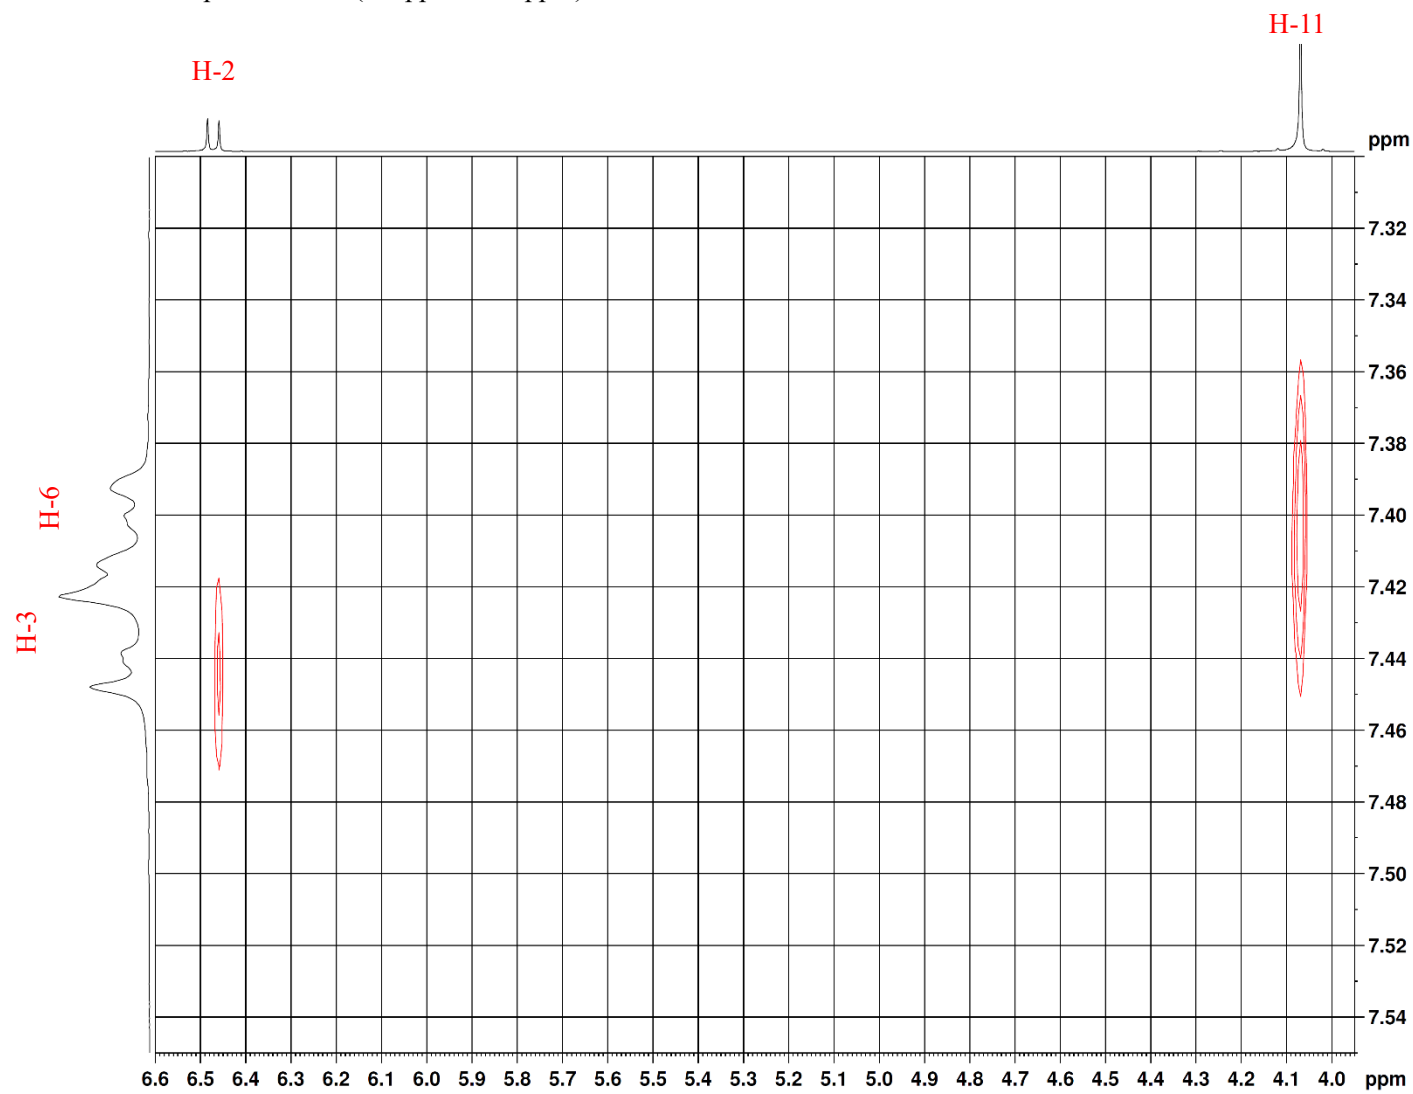

**Figure S34.**  $^1\text{H}$  NMR spectrum (400 MHz,  $\text{CDCl}_3$ , TMS) of **8**.

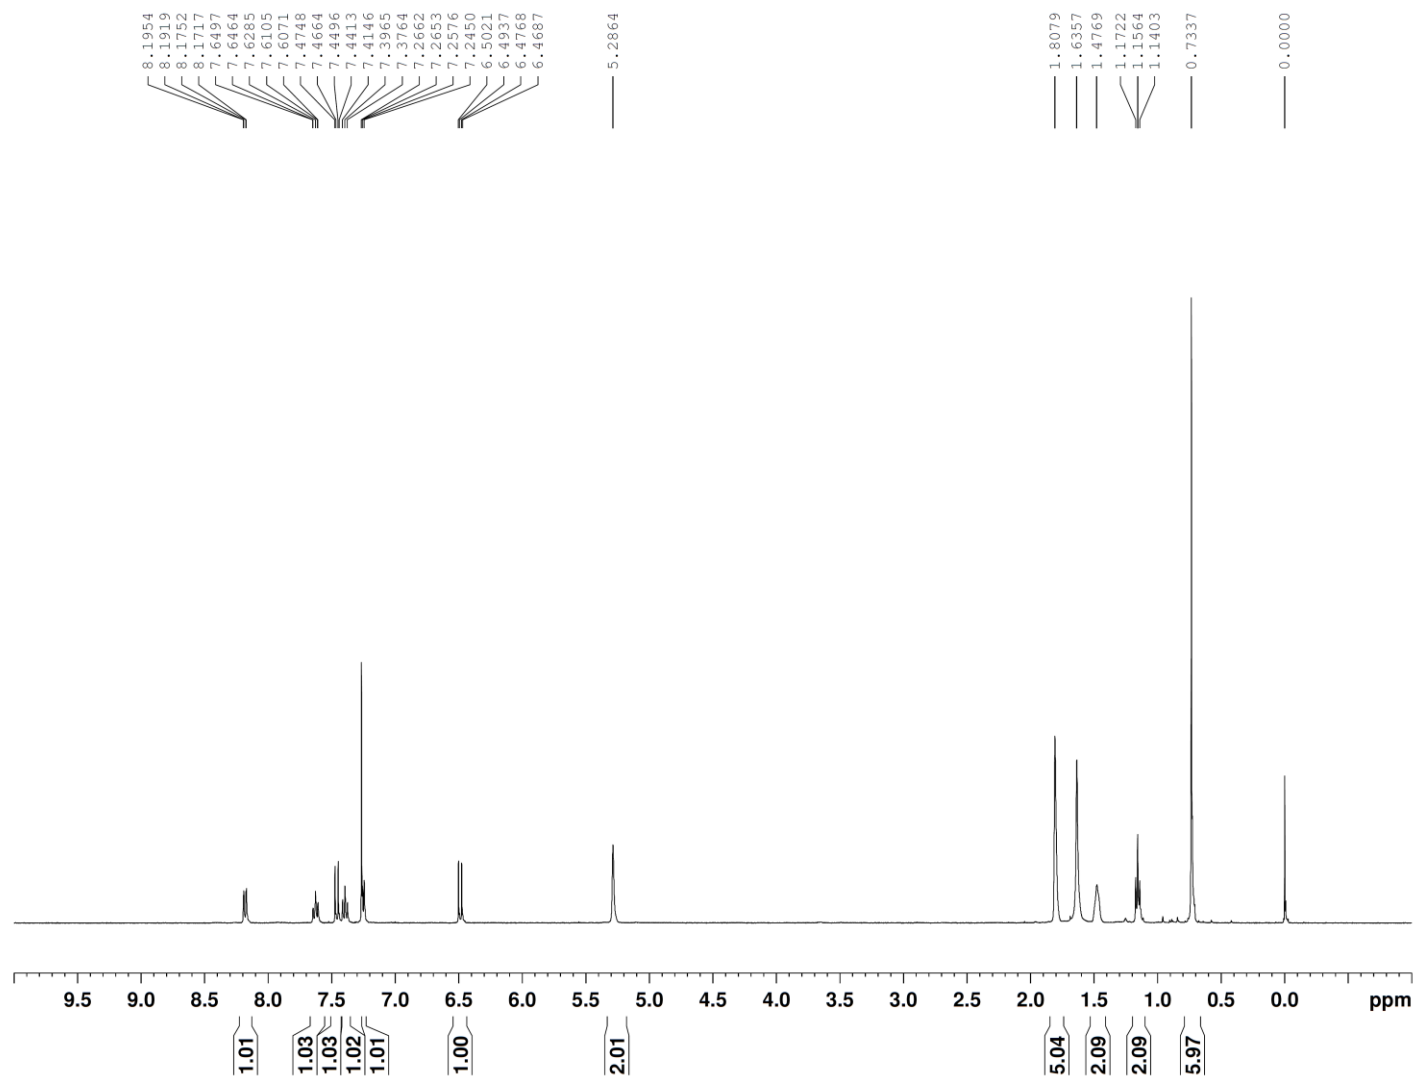

Figure S35.  $^{13}\text{C}\{^1\text{H}\}$  NMR spectrum (100 MHz,  $\text{CDCl}_3$ ) of **8**.

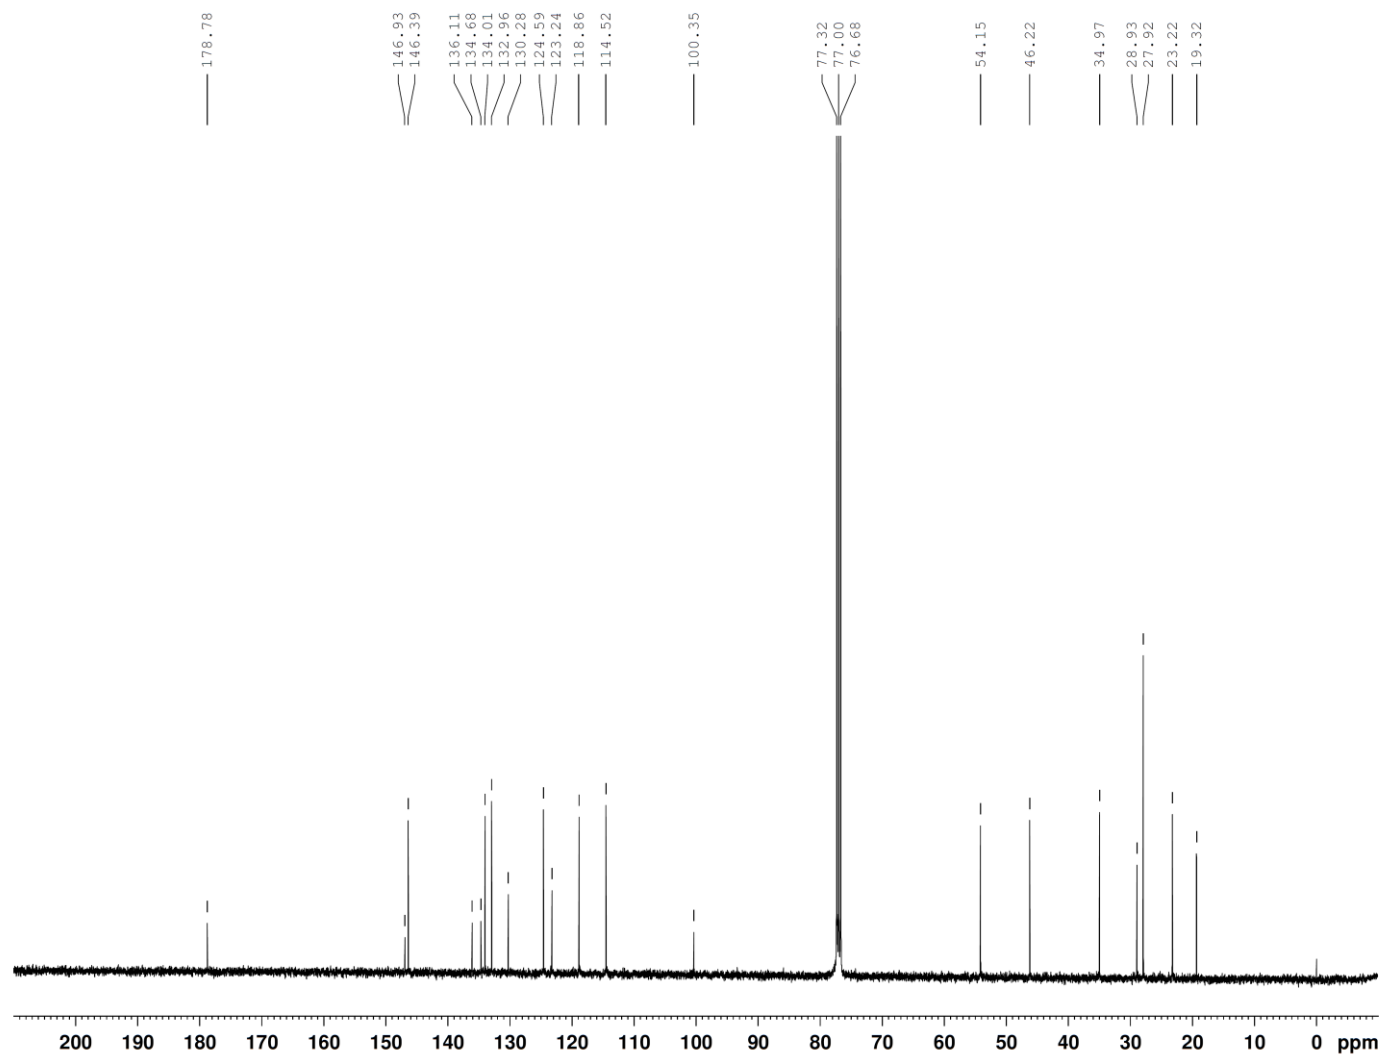

Figure S36. HMBC spectrum of 8.

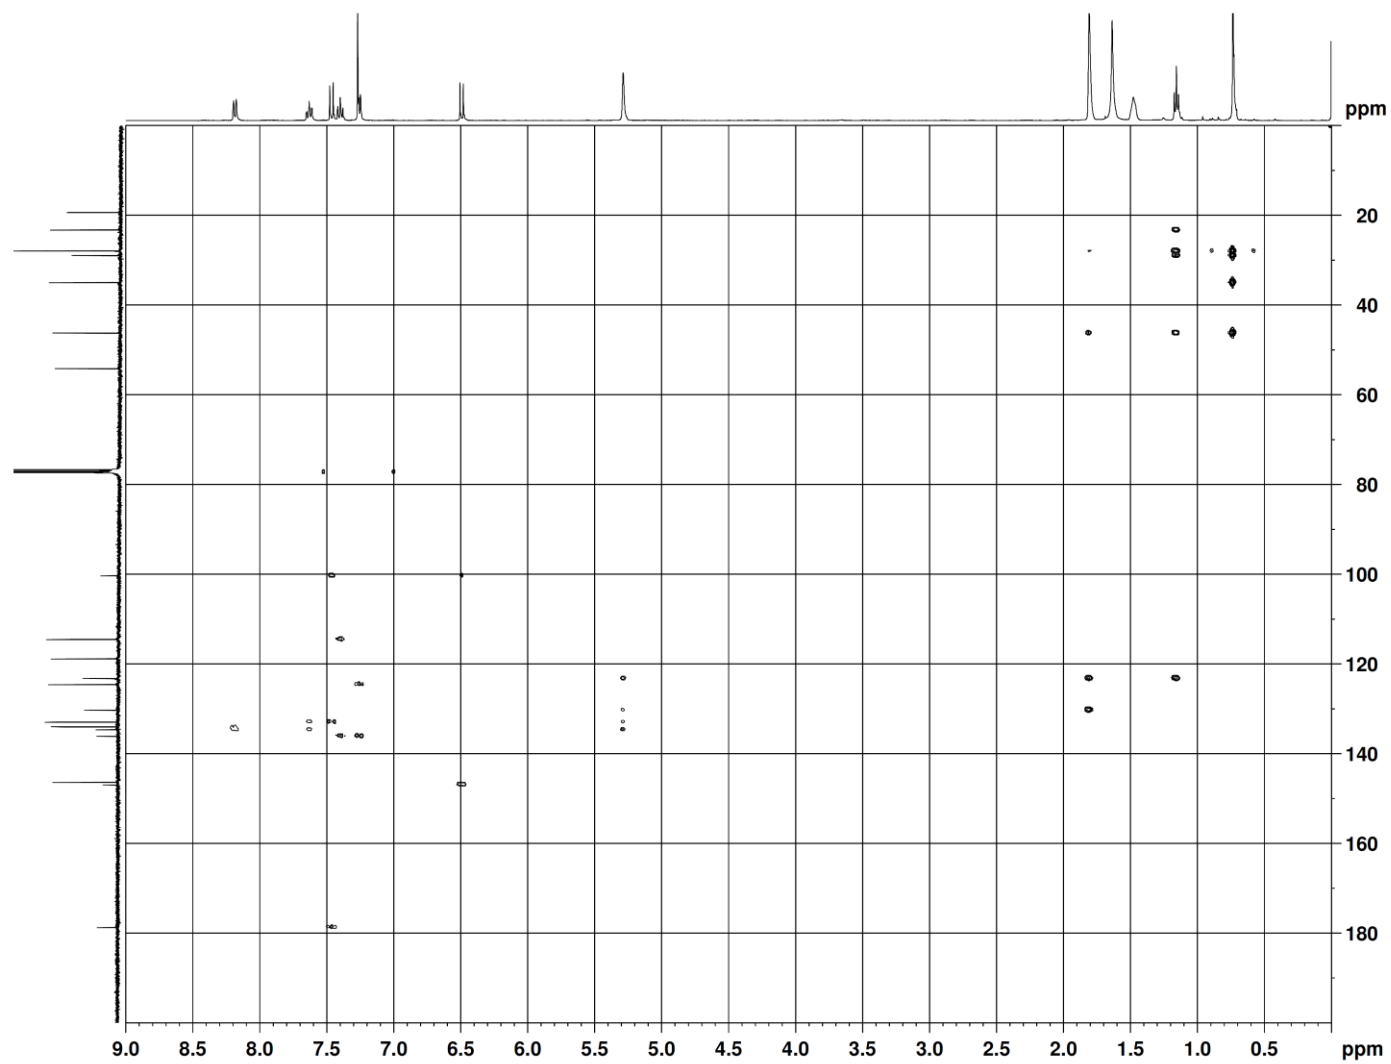

Figure S37. HMQC spectrum of **8**.

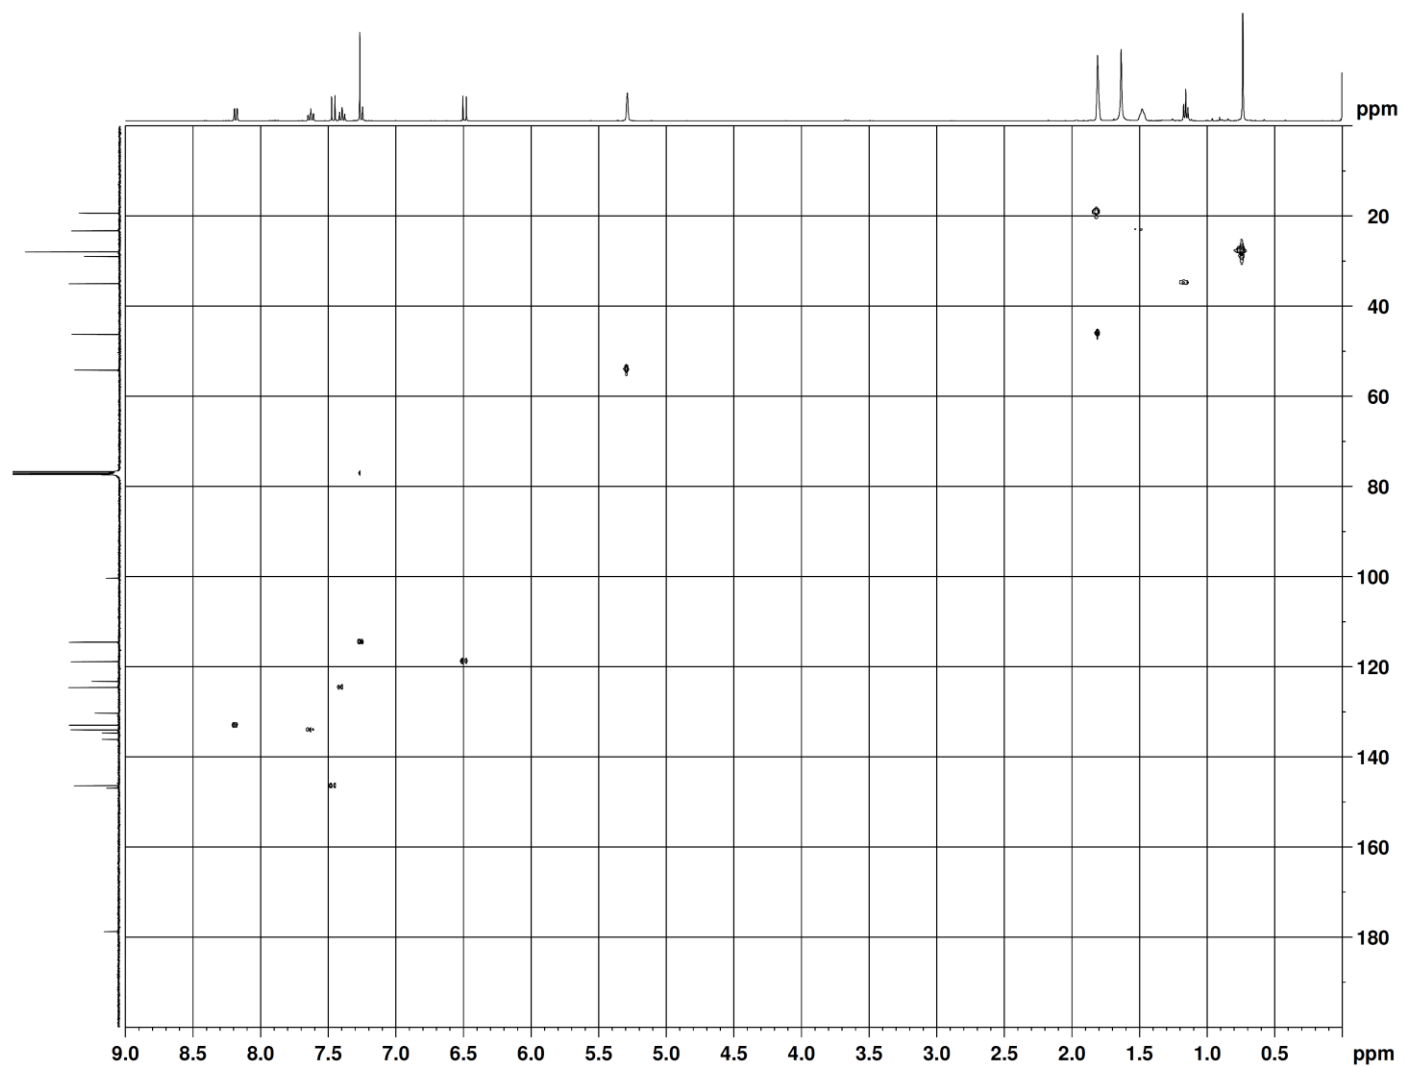

Figure S38. NOESY spectrum of **8**.

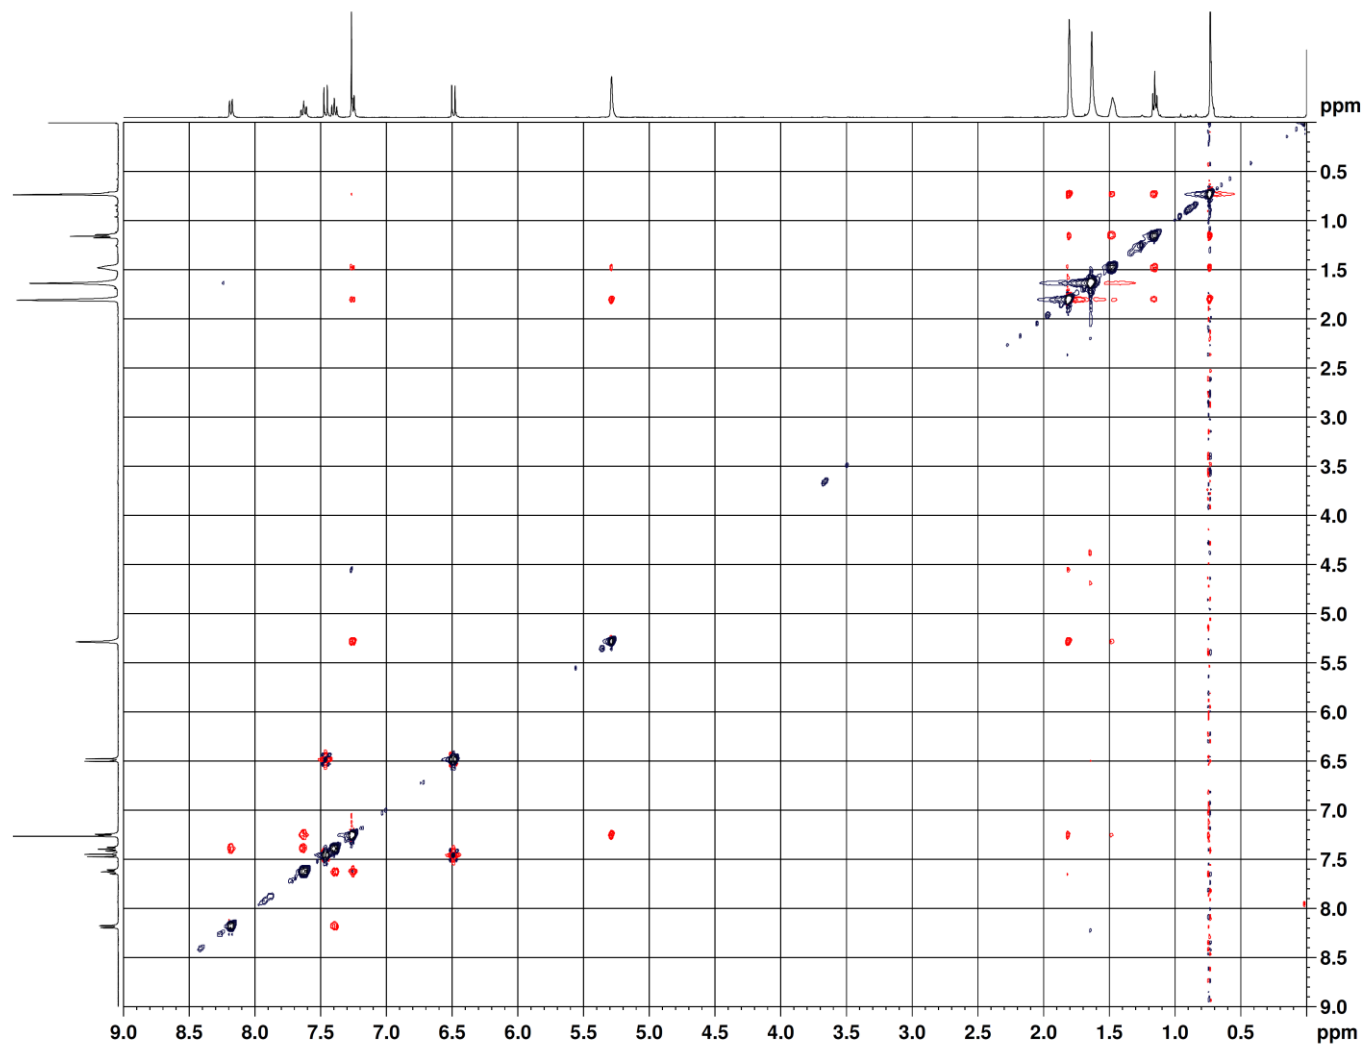



Figure S39. Zoom of NOESY spectrum of **8**.

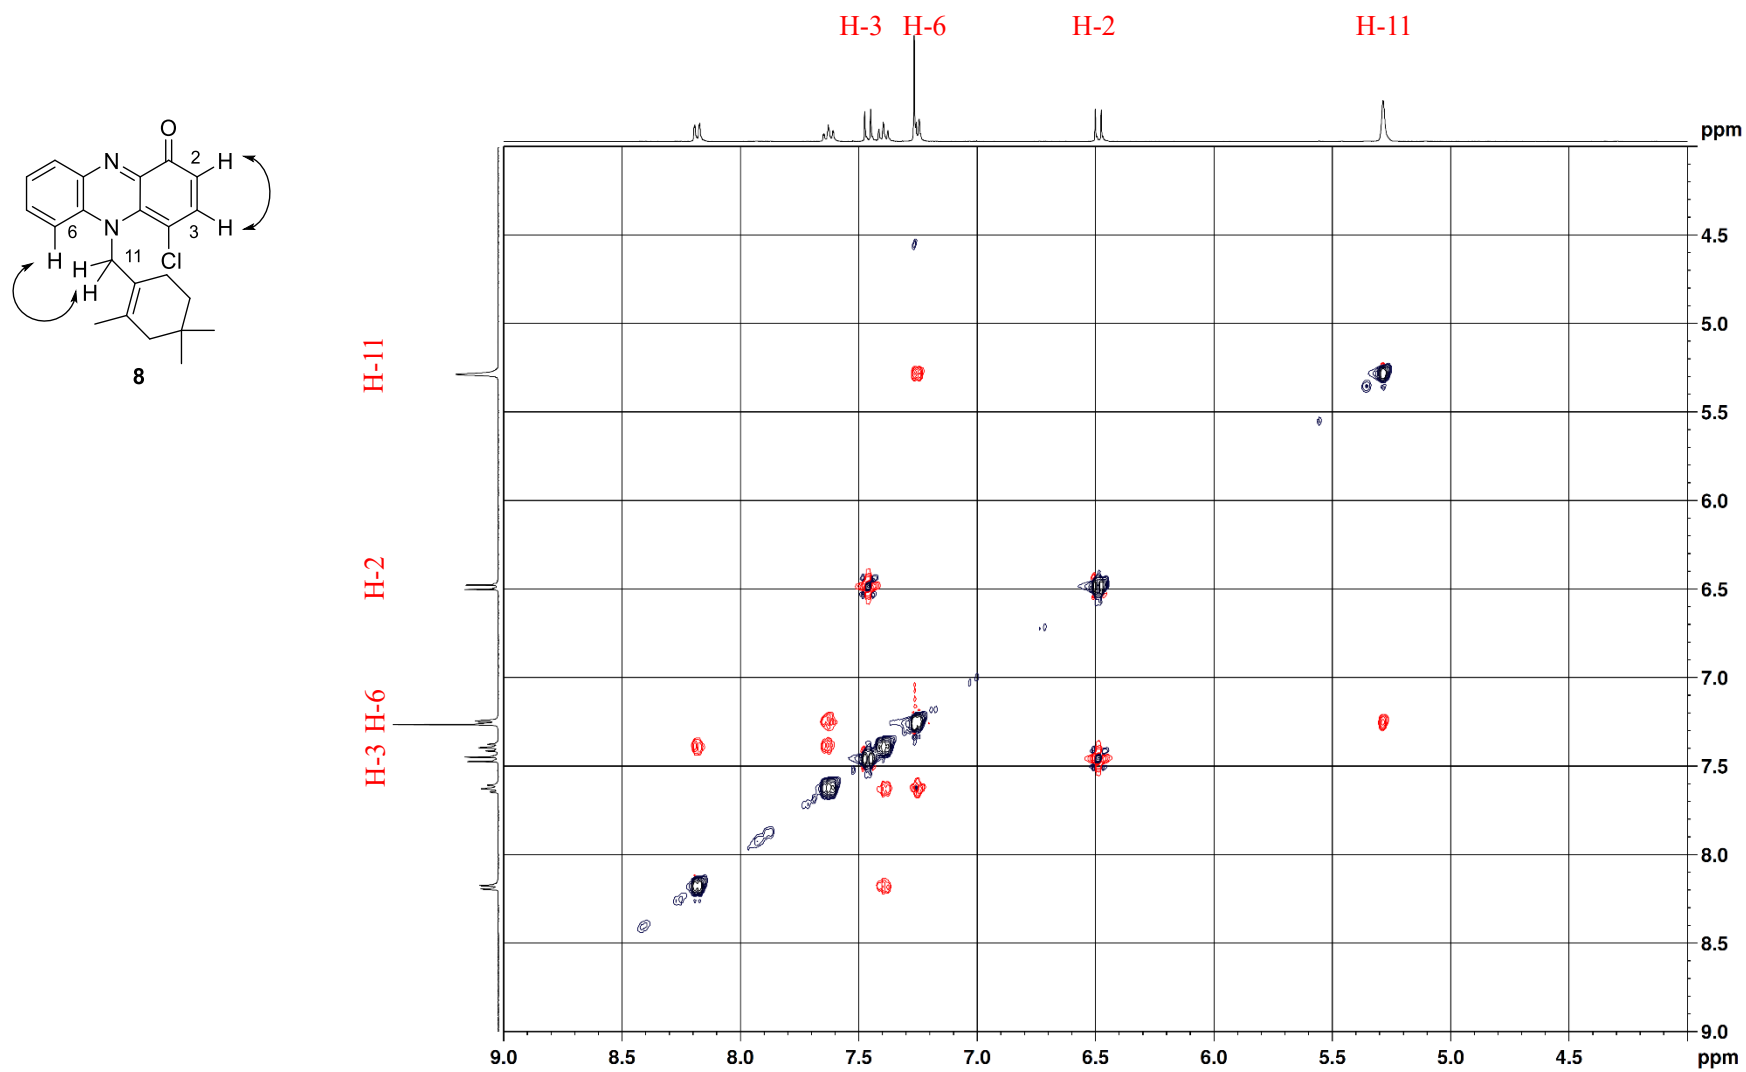

Supplement: ao0c04253_si_001.pdf [file ao0c04253_si_001.pdf]
